# Supplementary material for: Identification of islet-enriched long non-coding RNAs contributing to β-cell failure in type 2 diabetes
Source: PubMed Central journal article supplement — Mol Metab. 2017 Aug 18;6(11):1407–18. doi: 10.1016/j.molmet.2017.08.005 (PMC5681241; doi:10.1016/j.molmet.2017.08.005), 2017-08-18
Supplement: mmc1.pdf [file mmc1.pdf]

**Supplemental table 1.** List of primers utilized for measuring the RNA expression of genes and of Gapmers used for the down-regulation

| Primer name             | Sequence                 |
|-------------------------|--------------------------|
| <i>xloc_010971_F</i>    | GAACCACAGGAAGCAAGAGC     |
| <i>xloc_010971_R</i>    | GTGGCTCACGTGTCTGAGAA     |
| <i>xloc_013310_F</i>    | ATGCACAGGATTGCTGAGTG     |
| <i>xloc_013310_R</i>    | GCAACCACCTCACCTTTGTT     |
| <i>Hm_xloc_013310_F</i> | TGCCTGCCTTCTAGGACTGT     |
| <i>Hm_xloc_013310_R</i> | GAAAGGCAGCCAGCTATTTG     |
| <i>Proinsulin_F</i>     | GGAGCGTGGCTTCTTCTACA     |
| <i>Proinsulin_R</i>     | GCTGGTGCAGCACTGATCTA     |
| <i>CyclophilinA_F</i>   | CTCGAATAAGTTTGACTTGTGTTT |
| <i>CyclophilinA_R</i>   | CTAGGCATGGGAGGGAACA      |
| <i>18s_F</i>            | GGAATTATTCCCATGAACG      |
| <i>18s_R</i>            | GGCCTCACTAAACCATCCAA     |
| <i>B2M_F</i>            | TCCATCCGACATTGAAGTTG     |
| <i>B2M_R</i>            | CGCAGGCATACTCATCTT       |
| <i>Gapdh-F</i>          | TGCACCACCAACTGCTTAGC     |
| <i>Gapdh-R</i>          | GGCATGGACTGTGGTCATGAG    |
| Gapmer name             | Sequence                 |
| Gap_Ctrl                | AACACGTCTATACGC          |
| Gap6_βlinc3             | CTGAGAAAAGAAGAGC         |
| Gap8_βlinc3             | CAATCCAGAGCTTAGT         |

## Supplemental table 2

Characteristics of mice utilised for the RNA-sequencing.

| mouse ID       | weight before diet | weight at sacrifice (g) | glycemia at sacrifice (mg/dl) | Insulinemia at sacrifice (ng/ml) |
|----------------|--------------------|-------------------------|-------------------------------|----------------------------------|
| ND 1           | 21.7               | 30.3                    | 138.6                         | 0.52                             |
| ND 2           | 22.0               | 30.0                    | 140.4                         | 0.37                             |
| ND 3           | 19.5               | 27.1                    | 138.6                         | 0.61                             |
| <b>Average</b> | 21.1               | <b>29.1</b>             | <b>139.2</b>                  | <b>0.5</b>                       |
| <b>SEM</b>     | 0.8                | 1.0                     | 0.6                           | 0.1                              |
| HDR1           | 22.2               | 44.2                    | 169.2                         | 4.05                             |
| HDR2           | 21.0               | 41.1                    | 176.4                         | 0.74                             |
| HDR3           | 22.6               | 44.0                    | 165.6                         | 4.05                             |
| <b>Average</b> | 21.9               | <b>43.1</b>             | <b>170.4</b>                  | <b>2.95</b>                      |
| <b>SEM</b>     | 0.5                | 1.0                     | 3.2                           | 1.10                             |

**Supplemental table 3.**

**List of differentially expressed protein-coding genes in HFD versus ND mice**

The list is available at the foot of GSE92602

(GSE92602\_Differential\_Expression\_Results\_HFD\_vs\_ND.xlsx)

Supplemental table 4

List of differentially expressed UCSC lncRNAs between HFD and ND mice

| ID          | XLOC        | Regulation | logFC      | Fold       | AveExpr    | P.Value    | adj.P.Val  | UCSC_ID    | GeneSymbol                             | GeneID        |
|-------------|-------------|------------|------------|------------|------------|------------|------------|------------|----------------------------------------|---------------|
| XLOC_029148 | XLOC_029148 | Up         | 1.80994763 | 3.50629559 | -0.5506566 | 9.70E-05   | 0.01752245 | uc012evu.1 | 1700049E15Rik                          | 100039727     |
| XLOC_021912 | XLOC_021912 | Up         | 0.65835819 | 1.57828549 | 3.42991932 | 0.0001561  | 0.01956733 | uc012cpw.1 | Gm8234                                 | 666680        |
| XLOC_029119 | XLOC_029119 | Up         | 1.59739788 | 3.02597042 | -0.5458295 | 0.00017976 | 0.02045922 | uc009epq.1 | 5330439B14Rik                          | 321015        |
| XLOC_010356 | XLOC_010356 | Up         | 0.86337084 | 1.81928409 | 1.76873487 | 0.00021611 | 0.02130071 | uc007uiz.1 | AK076947                               |               |
| XLOC_029448 | XLOC_029448 | Up         | 2.20457966 | 4.60940222 | -1.1147372 | 0.00038887 | 0.02574536 | uc009cjp.1 | AK219219                               |               |
| XLOC_008742 | XLOC_008742 | Up         | 0.52985109 | 1.44378016 | 4.52345658 | 0.0004301  | 0.02644799 | uc007pmb.1 | AK203628                               |               |
| XLOC_028867 | XLOC_028867 | Up         | 0.41603462 | 1.33425519 | 6.30583674 | 0.0005327  | 0.02790084 | uc009dph.1 | DQ693239                               |               |
| XLOC_000191 | XLOC_000191 | Up         | 0.3308615  | 1.25776422 | 8.37183206 | 0.00059272 | 0.02873685 | uc007beu.1 | AK217854                               |               |
| XLOC_004694 | XLOC_004694 | Up         | 0.69959539 | 1.62404925 | 8.71022589 | 0.00063276 | 0.02936456 | uc007kgm.1 | AK217986                               | 237860        |
| XLOC_034321 | XLOC_034321 | Up         | 2.59636201 | 6.04759704 | -3.5893597 | 0.00064741 | 0.02946011 | uc009kuu.1 | AK047141                               |               |
| XLOC_038841 | XLOC_038841 | Up         | 0.36822912 | 1.29076747 | 8.49241959 | 0.00076783 | 0.03060202 | uc009uah.1 | AK185530                               | 11306         |
| XLOC_018743 | XLOC_018743 | Up         | 0.58780002 | 1.50295313 | 7.47152883 | 0.00081776 | 0.03102346 | uc008joj.1 | EF437368                               |               |
| XLOC_004765 | XLOC_004765 | Up         | 4.46879417 | 22.1432361 | -4.9068956 | 0.00106877 | 0.03277531 | uc007kpb.2 | E230016K23Rik                          | 414102        |
| XLOC_031223 | XLOC_031223 | Up         | 1.26471749 | 2.40280153 | 2.99815655 | 0.00117378 | 0.03317261 | uc009iei.1 | AK199694                               |               |
| XLOC_036122 | XLOC_036122 | Up         | 0.36556779 | 1.28838859 | 6.32563197 | 0.00162232 | 0.03702339 | uc009qwi.1 | DQ714940                               |               |
| XLOC_025434 | XLOC_025434 | Up         | 1.16067122 | 2.23561417 | 2.46572737 | 0.00209699 | 0.04062686 | uc008wdg.1 | AK167606,BC064108,AK030886             |               |
| XLOC_021772 | XLOC_021772 | Up         | 0.61688447 | 1.5335985  | 6.565575   | 0.00226997 | 0.04171983 | uc008ork.1 | AK217986                               |               |
| XLOC_013797 | XLOC_013797 | Up         | 1.0038028  | 2.00527876 | -1.5352851 | 0.00227604 | 0.04174372 | uc007zty.1 | AK085322,AK085480                      |               |
| XLOC_010411 | XLOC_010411 | Up         | 0.44265534 | 1.35910351 | 3.72058033 | 0.00245876 | 0.04324499 | uc007uqa.1 | AK135997                               |               |
| XLOC_008884 | XLOC_008884 | Up         | 1.42250578 | 2.68050677 | -1.5831504 | 0.00282958 | 0.04480063 | uc007qca.1 | AK141540                               |               |
| XLOC_021954 | XLOC_021954 | Up         | 0.99401579 | 1.99172131 | 2.35431834 | 0.00303368 | 0.04601905 | uc008pmm.1 | AK044425                               |               |
| XLOC_027481 | XLOC_027481 | Up         | 0.76159895 | 1.69536857 | 0.20985274 | 0.00370707 | 0.04972975 | uc008znp.1 | AK040553                               |               |
| XLOC_028343 | XLOC_028343 | Up         | 0.55621474 | 1.47040619 | 3.62706814 | 0.00372074 | 0.04972975 | uc009ayu.1 | AK003812,AK143417                      |               |
| ID          | XLOC        | Regulation | logFC      | Fold       | AveExpr    | P.Value    | adj.P.Val  | UCSC_ID    | GeneSymbol                             | GeneID        |
| XLOC_027277 | XLOC_027277 | Down       | -1.9088381 | 3.7550656  | 0.47174552 | 3.01E-06   | 0.00874554 | uc008ysk.2 | u Miat                                 | 330166        |
| XLOC_009040 | XLOC_009040 | Down       | -4.8872753 | 29.5948712 | -5.3980178 | 3.93E-05   | 0.01343425 | uc007quf.1 | AK015470,AK030052                      |               |
| XLOC_020670 | XLOC_020670 | Down       | -0.9370078 | 1.91455325 | 2.9494688  | 9.89E-05   | 0.01752245 | uc012cdx.1 | 4932416H05Rik                          | 654409        |
| XLOC_011841 | XLOC_011841 | Down       | -0.8540675 | 1.80759008 | 4.58890139 | 0.00013959 | 0.01933069 | uc011zxm.1 | Mirlet7c-2,Mirlet7b                    | 723966,387245 |
| XLOC_014978 | XLOC_014978 | Down       | -0.8803052 | 1.84076464 | 4.14013004 | 0.00015328 | 0.01956474 | uc008bjk.1 | AK015714                               |               |
| XLOC_010936 | XLOC_010936 | Down       | -0.9375514 | 1.91527479 | 4.76907252 | 0.00014628 | 0.01956474 | uc007ukb.1 | AK005591                               |               |
| XLOC_008479 | XLOC_008479 | Down       | -0.9105209 | 1.87972405 | 4.22613361 | 0.00017185 | 0.02038134 | uc007qse.1 | AK043531                               |               |
| XLOC_034057 | XLOC_034057 | Down       | -1.1171934 | 2.16924561 | 2.96760563 | 0.00018523 | 0.02068731 | uc009mzp.1 | AK139634                               |               |
| XLOC_033912 | XLOC_033912 | Down       | -1.2484843 | 2.37591685 | -0.7313986 | 0.00024155 | 0.02203725 | uc009mko.1 | AK085891                               |               |
| XLOC_019841 | XLOC_019841 | Down       | -0.821528  | 1.76727677 | 4.20585727 | 0.0002443  | 0.02207741 | uc008ofb.1 | AK085136                               | 14683         |
| XLOC_022633 | XLOC_022633 | Down       | -0.6885734 | 1.61168901 | 5.16588241 | 0.00027072 | 0.02322993 | uc008pue.1 | AK007191,AK008852                      |               |
| XLOC_005204 | XLOC_005204 | Down       | -0.8435503 | 1.79446065 | 2.59181443 | 0.00030377 | 0.02444607 | uc007mtt.1 | AK191498                               |               |
| XLOC_033767 | XLOC_033767 | Down       | -0.8218622 | 1.76768626 | 3.17130721 | 0.00033455 | 0.02532849 | uc009lrg.1 | AK083994                               |               |
| XLOC_007454 | XLOC_007454 | Down       | -0.858737  | 1.81345004 | 1.20158283 | 0.00038479 | 0.02574536 | uc007nur.1 | AK014974                               |               |
| XLOC_029329 | XLOC_029329 | Down       | -0.7534879 | 1.68586374 | 2.91062623 | 0.00039028 | 0.02576683 | uc009btx.1 | AK158926                               |               |
| XLOC_032558 | XLOC_032558 | Down       | -0.7879671 | 1.72663971 | 4.81062742 | 0.0004045  | 0.02607304 | uc012fpb.1 | AK084903,46324271                      | 666737        |
| XLOC_028715 | XLOC_028715 | Down       | -0.5936811 | 1.50909231 | 3.44737885 | 0.00041543 | 0.02644183 | uc012eop.1 | Gm5577                                 | 434064        |
| XLOC_019204 | XLOC_019204 | Down       | -1.3429288 | 2.53665762 | -0.5416471 | 0.00043143 | 0.02644799 | uc008lft.1 | C230071H18Rik                          | 277414        |
| XLOC_006144 | XLOC_006144 | Down       | -0.6520298 | 1.57137747 | 3.23626109 | 0.00047034 | 0.02700892 | uc011yix.1 | AK013668                               |               |
| XLOC_028547 | XLOC_028547 | Down       | -0.8550312 | 1.80879786 | 4.56411187 | 0.00047569 | 0.02700892 | uc009bxb.1 | AK043004                               |               |
| XLOC_017702 | XLOC_017702 | Down       | -0.9027245 | 1.8695934  | 2.81116543 | 0.00048915 | 0.02732984 | uc008ibo.1 | AK143957                               |               |
| XLOC_018695 | XLOC_018695 | Down       | -0.638434  | 1.55663853 | 2.6906766  | 0.00051353 | 0.02762481 | uc008jhz.1 | AK147796,AK081497                      |               |
| XLOC_023981 | XLOC_023981 | Down       | -0.6099746 | 1.52623231 | 4.24250158 | 0.00052972 | 0.02790084 | uc008tvm.1 | AK002929                               |               |
| XLOC_030762 | XLOC_030762 | Down       | -0.7680126 | 1.7029223  | 2.50959449 | 0.00052659 | 0.02790084 | uc009giy.1 | AK087850                               |               |
| XLOC_008496 | XLOC_008496 | Down       | -0.7434735 | 1.67420182 | 4.99802992 | 0.00054178 | 0.02807659 | uc007qve.1 | Etoh2                                  | 13996         |
| XLOC_011611 | XLOC_011611 | Down       | -1.150621  | 2.22009434 | 0.83027076 | 0.0005533  | 0.02823084 | uc007waz.1 | AK085274                               |               |
| XLOC_018767 | XLOC_018767 | Down       | -0.7000802 | 1.62459514 | 3.61556768 | 0.00057637 | 0.02846482 | uc008jqz.1 | AK079699                               |               |
| XLOC_011581 | XLOC_011581 | Down       | -1.0338707 | 2.04751026 | -0.6638605 | 0.00064739 | 0.02946011 | uc007vxh.1 | DQ557693,DQ716549,DQ724814,DQ555935,DI |               |
| XLOC_001502 | XLOC_001502 | Down       | -1.0718601 | 2.10214193 | 0.11490251 | 0.00065527 | 0.02950988 | uc007dzz.1 | BC072557                               |               |
| XLOC_034392 | XLOC_034392 | Down       | -1.2388409 | 2.36008848 | 0.22689078 | 0.00068554 | 0.03002511 | uc009ldl.2 | A930013F10Rik                          | 68074         |
| XLOC_019205 | XLOC_019205 | Down       | -1.0651761 | 2.0924252  | -1.0335943 | 0.00069663 | 0.03010489 | uc008lga.1 | AK165443,AK143789                      |               |
| XLOC_012227 | XLOC_012227 | Down       | -0.7926767 | 1.73228552 | 4.82766597 | 0.00070796 | 0.03018385 | uc011ztp.1 | Mir30b,Mir30d                          | 387226,387228 |
| XLOC_016478 | XLOC_016478 | Down       | -1.2360718 | 2.35556276 | 0.41312444 | 0.00072859 | 0.03053237 | uc008foo.1 | AK085760                               | 17191         |
| XLOC_038271 | XLOC_038271 | Down       | -0.9667744 | 1.95446589 | 4.52240504 | 0.00075973 | 0.03060202 | uc012hnh.1 | Mir374c                                | 100526513     |
| XLOC_029656 | XLOC_029656 | Down       | -2.1888235 | 4.55933535 | -3.1201513 | 0.00076275 | 0.03060202 | uc009dih.1 | AK076253                               | 232334        |
| XLOC_017364 | XLOC_017364 | Down       | -0.8598534 | 1.81485388 | 2.5835536  | 0.0008156  | 0.03102346 | uc008gkx.1 | AK018996                               |               |
| XLOC_033578 | XLOC_033578 | Down       | -0.5920057 | 1.50734089 | 2.93221274 | 0.00088355 | 0.03178599 | uc009kve.1 | BC030398                               |               |
| XLOC_022909 | XLOC_022909 | Down       | -0.8163763 | 1.76097733 | 0.71613912 | 0.0009146  | 0.03182895 | uc008rev.1 | AK015409                               |               |
| XLOC_036086 | XLOC_036086 | Down       | -0.7668047 | 1.70149709 | 1.4760656  | 0.00093748 | 0.03202297 | uc009qsg.1 | AK017040                               |               |
| XLOC_011604 | XLOC_011604 | Down       | -1.1098088 | 2.1581705  | -0.6857761 | 0.00094783 | 0.03210759 | uc007vzd.1 | Gsdmcl1                                | 74460         |
| XLOC_030771 | XLOC_030771 | Down       | -0.7363391 | 1.66594303 | 3.55205535 | 0.00097263 | 0.03227482 | uc012fio.1 | E130304I02Rik                          | 78547         |
| XLOC_019903 | XLOC_019903 | Down       | -0.6993394 | 1.62376114 | 3.40402851 | 0.00101154 | 0.03235366 | uc008omf.1 | AK082896                               |               |

|             |             |      |            |            |            |            |            |               |                      |                      |
|-------------|-------------|------|------------|------------|------------|------------|------------|---------------|----------------------|----------------------|
| XLOC_011034 | XLOC_011034 | Down | -1.0084113 | 2.01169453 | -0.259548  | 0.00101775 | 0.03235366 | uc007uwu.1    | AK014964             |                      |
| XLOC_007281 | XLOC_007281 | Down | -1.0379102 | 2.05325134 | -0.9533642 | 0.00103732 | 0.032507   | uc007mxz.1    | AK040557             |                      |
| XLOC_033669 | XLOC_033669 | Down | -0.6974174 | 1.62159935 | 4.35174316 | 0.00110714 | 0.03312904 | uc009ldg.1    | BC035532             | 20516                |
| XLOC_009135 | XLOC_009135 | Down | -0.5303283 | 1.4442578  | 3.18980187 | 0.00117645 | 0.03317261 | uc011zbn.1    | D430050G20           | 328287               |
| XLOC_000146 | XLOC_000146 | Down | -2.8986318 | 7.45718843 | -5.0797239 | 0.00115635 | 0.03317261 | uc007ayw.1    | AK052226             |                      |
| XLOC_024509 | XLOC_024509 | Down | -0.6523365 | 1.57171162 | 4.8977003  | 0.00121111 | 0.03350715 | uc008sdd.2    | 4930528A17Rik        | 67735                |
| XLOC_009841 | XLOC_009841 | Down | -0.6542054 | 1.57374898 | 3.22181604 | 0.00120017 | 0.03350715 | uc007sgd.1    | AK085942             |                      |
| XLOC_008930 | XLOC_008930 | Down | -0.7141201 | 1.6404824  | 4.89400603 | 0.00129821 | 0.03413816 | uc011yzb.1,u  | Mirlet7d,Mirlet7f-1, | 387247,387252,387244 |
| XLOC_004526 | XLOC_004526 | Down | -1.012305  | 2.01713127 | -0.8192838 | 0.00134556 | 0.03472533 | uc007jip.1    | AK005754             |                      |
| XLOC_016431 | XLOC_016431 | Down | -0.7166607 | 1.64337381 | 4.13537382 | 0.001376   | 0.03496982 | uc008bfc.1    | AK040485             | 93687                |
| XLOC_024546 | XLOC_024546 | Down | -0.6717303 | 1.59298234 | 2.06428387 | 0.00142721 | 0.03531284 | uc008shn.1    | AK016961             |                      |
| XLOC_009979 | XLOC_009979 | Down | -1.0735794 | 2.1046487  | 0.75106964 | 0.00149958 | 0.03581222 | uc007srp.1    | 4931406H21Rik        | 77592                |
| XLOC_003579 | XLOC_003579 | Down | -1.0054132 | 2.00751837 | -0.3077411 | 0.00157815 | 0.03667122 | uc011xpd.1    | Mirlet7i             | 387251               |
| XLOC_031178 | XLOC_031178 | Down | -1.1758211 | 2.25921425 | 1.74195035 | 0.00160739 | 0.03695188 | uc012fne.1    | Mir7-2               | 723884               |
| XLOC_035832 | XLOC_035832 | Down | -0.7077711 | 1.63327887 | 4.55652587 | 0.00170748 | 0.03762504 | uc009pet.1    | AK017092             |                      |
| XLOC_005189 | XLOC_005189 | Down | -1.0784758 | 2.11180382 | -1.6967466 | 0.00173763 | 0.03776689 | uc007mrf.1    | AK077811             |                      |
| XLOC_000046 | XLOC_000046 | Down | -0.749113  | 1.68075918 | 5.98495836 | 0.00177899 | 0.03816261 | uc011wip.1,u  | Mir30a,Mir30c-2      | 387225,723964        |
| XLOC_013778 | XLOC_013778 | Down | -0.8788589 | 1.83892026 | 4.08701031 | 0.00183832 | 0.03871062 | uc012ahc.1    | Mir691               | 751561               |
| XLOC_016615 | XLOC_016615 | Down | -0.6661865 | 1.58687279 | 2.7525963  | 0.00185156 | 0.03877447 | uc008elj.1,uc | BC094408,AK216043    |                      |
| XLOC_019790 | XLOC_019790 | Down | -0.7866587 | 1.72507452 | 3.1520588  | 0.0018517  | 0.03877447 | uc008nzz.1    | AK077405             |                      |
| XLOC_028431 | XLOC_028431 | Down | -0.8241209 | 1.77045593 | -0.4898052 | 0.00186427 | 0.03878183 | uc009bjy.1    | AK137583             |                      |
| XLOC_028716 | XLOC_028716 | Down | -0.8344089 | 1.78312631 | 3.2967317  | 0.00191064 | 0.03922364 | uc009cut.1    | AK185681             |                      |
| XLOC_017740 | XLOC_017740 | Down | -0.7069239 | 1.63232002 | 1.33904899 | 0.00191907 | 0.03930543 | uc008gat.1    | AK086315             |                      |
| XLOC_022616 | XLOC_022616 | Down | -1.0304365 | 2.0426422  | -1.4946188 | 0.00196651 | 0.03959375 | uc012crb.1    | Rnu73a               | 19870                |
| XLOC_017529 | XLOC_017529 | Down | -0.9463615 | 1.92700659 | 1.64775078 | 0.0019963  | 0.03978129 | uc012bko.1    | B430203M17Rik        | 19211                |
| XLOC_033569 | XLOC_033569 | Down | -0.5782728 | 1.49306073 | 4.02476239 | 0.00200479 | 0.03979854 | uc009kuf.1    | AK007249             |                      |
| XLOC_032016 | XLOC_032016 | Down | -0.8486389 | 1.80080116 | -0.352128  | 0.00218593 | 0.04121498 | uc009fvo.1    | AK042797             |                      |
| XLOC_019907 | XLOC_019907 | Down | -0.5866991 | 1.50180668 | 4.03285592 | 0.00221108 | 0.04132119 | uc012cmr.1,u  | Uckl1os              | 100271841            |
| XLOC_005405 | XLOC_005405 | Down | -0.7349636 | 1.66435543 | 0.23167342 | 0.00222703 | 0.04141987 | uc011xuh.1    | Mir804               | 100049547            |
| XLOC_006142 | XLOC_006142 | Down | -0.6085376 | 1.52471293 | 3.37296437 | 0.00227545 | 0.04174372 | uc007msb.2    | 2810410L24Rik        | 100042332            |
| XLOC_024992 | XLOC_024992 | Down | -1.3015758 | 2.46497971 | 0.282364   | 0.00228773 | 0.04174372 | uc008uaf.1    | AK140147             |                      |
| XLOC_032596 | XLOC_032596 | Down | -0.9710373 | 1.96024948 | -0.5542192 | 0.00231291 | 0.04189546 | uc009imz.1    | AK040808             |                      |
| XLOC_029244 | XLOC_029244 | Down | -0.638813  | 1.55704759 | 4.6894092  | 0.00238679 | 0.04264858 | uc009bfy.1    | BC145649             |                      |
| XLOC_028373 | XLOC_028373 | Down | -0.7079356 | 1.63346502 | 4.66653701 | 0.00239366 | 0.04264858 | uc012eiv.1    | Mir129-1             | 387237               |
| XLOC_003139 | XLOC_003139 | Down | -0.5692614 | 1.48376378 | 2.82445221 | 0.00242416 | 0.04287358 | uc007ezc.1    | AK145144             |                      |
| XLOC_019005 | XLOC_019005 | Down | -1.5569574 | 2.94232655 | -3.2797779 | 0.00252602 | 0.04330932 | uc012bzn.1    | Mir1955              | 100316756            |
| XLOC_006905 | XLOC_006905 | Down | -0.7965738 | 1.73697119 | -0.1911132 | 0.00255807 | 0.04361372 | uc007nsv.1    | AK016427             |                      |
| XLOC_013605 | XLOC_013605 | Down | -1.7701293 | 3.41084527 | -3.0098627 | 0.00262126 | 0.04368929 | uc007ywk.1    | AK018484             |                      |
| XLOC_005688 | XLOC_005688 | Down | -0.7404739 | 1.67072458 | 3.51290548 | 0.00267886 | 0.0438434  | uc011yab.1    | AK053376             |                      |
| XLOC_038525 | XLOC_038525 | Down | -0.8260984 | 1.77288426 | 0.61698818 | 0.00275475 | 0.04447008 | uc009ssq.1    | AK170409             |                      |
| XLOC_023703 | XLOC_023703 | Down | -0.8746578 | 1.83357309 | -0.3081197 | 0.00276574 | 0.04451001 | uc008sjb.1    | AK086793             |                      |
| XLOC_036830 | XLOC_036830 | Down | -1.2568013 | 2.38965324 | 0.79242946 | 0.00279355 | 0.04459347 | uc009pxu.1    | AK138089             | 23806                |
| XLOC_034110 | XLOC_034110 | Down | -1.0073317 | 2.01018976 | -0.9480135 | 0.00283754 | 0.04487443 | uc009nga.1    | AK015712             |                      |
| XLOC_008173 | XLOC_008173 | Down | -0.7626069 | 1.69655344 | 1.03253991 | 0.00285891 | 0.04500298 | uc007piv.1    | AK164218             | 14569                |
| XLOC_031457 | XLOC_031457 | Down | -1.4711303 | 2.77239014 | -2.2366731 | 0.00288128 | 0.04516823 | uc012fsj.1    | A630005I04Rik        | 11865                |
| XLOC_012455 | XLOC_012455 | Down | -1.1664822 | 2.244637   | -0.1312978 | 0.00297752 | 0.04560339 | uc007xeb.1    | AK020795             |                      |
| XLOC_034261 | XLOC_034261 | Down | -1.2477    | 2.37462557 | -1.8543164 | 0.00310998 | 0.04645502 | uc009nvw.1    | AK013187             |                      |
| XLOC_029644 | XLOC_029644 | Down | -0.7111258 | 1.6370811  | 0.82398592 | 0.00318272 | 0.04679629 | uc009dfe.1    | AK016007             |                      |
| XLOC_006135 | XLOC_006135 | Down | -0.812701  | 1.75649688 | 1.15846233 | 0.00319871 | 0.04690461 | uc007mre.1    | AK182874             |                      |
| XLOC_034729 | XLOC_034729 | Down | -0.7883099 | 1.72705005 | 4.88456036 | 0.00327911 | 0.04744422 | uc012gil.1    | 4930488L21Rik        | 75809                |
| XLOC_009299 | XLOC_009299 | Down | -0.5772451 | 1.49199744 | 4.26245205 | 0.00330788 | 0.04759604 | uc007rzr.2    | 3110070M22Rik        | 67304                |
| XLOC_017329 | XLOC_017329 | Down | -0.8518204 | 1.80477676 | 5.75432291 | 0.0033069  | 0.04759604 | uc012bhf.1,u  | AK009639,AK215842    |                      |
| XLOC_024955 | XLOC_024955 | Down | -1.1711211 | 2.25186615 | -1.0548457 | 0.00333746 | 0.04778011 | uc008tui.1    | AK145828             |                      |
| XLOC_028671 | XLOC_028671 | Down | -0.6912429 | 1.614674   | 1.45376134 | 0.00337049 | 0.04780859 | uc009cnm.1    | B230319C09Rik        | 320775               |
| XLOC_012505 | XLOC_012505 | Down | -0.9209195 | 1.89332164 | 0.52951075 | 0.00337342 | 0.04780859 | uc011zjy.1    | E330033B04Rik        | 319722               |
| XLOC_035803 | XLOC_035803 | Down | -0.7363543 | 1.66596059 | 2.31750594 | 0.00343296 | 0.04825478 | uc009pak.2,u  | 2610203C20Rik,Mir:   | 100042464,387236     |
| XLOC_015351 | XLOC_015351 | Down | -0.6826405 | 1.60507472 | 2.77301781 | 0.003627   | 0.04930441 | uc012app.1    | H2-K2                | 630499               |
| XLOC_002921 | XLOC_002921 | Down | -0.7511265 | 1.68310659 | 0.5626051  | 0.00366324 | 0.04952706 | uc007hip.1    | AK077682             |                      |
| XLOC_034340 | XLOC_034340 | Down | -0.883764  | 1.84518311 | -1.3646717 | 0.00366341 | 0.04952706 | uc012fzw.1    | Mir1968              | 100316713            |
| XLOC_024068 | XLOC_024068 | Down | -0.8006946 | 1.74193957 | 0.22965874 | 0.00371943 | 0.04972975 | uc008ugf.1    | AK010894             |                      |
| XLOC_002768 | XLOC_002768 | Down | -0.8282175 | 1.77549035 | -0.7564176 | 0.00371459 | 0.04972975 | uc007gvg.1    | AK029692             |                      |
| XLOC_013488 | XLOC_013488 | Down | -0.9531242 | 1.93606071 | -1.1005545 | 0.00376365 | 0.04983494 | uc007yep.1    | AK046786             |                      |



**Supplemental table 5****List of differentially expressed novel lncRNAs between HFD and ND mice****u= intergenic transcripts, x=exonic overlap with reference on the opposite strand**

| <b>ID</b>   | <b>XLOC</b> | <b>Regulation</b> | <b>logFC</b> | <b>Fold</b> | <b>AveExpr</b> | <b>P.Value</b> | <b>adj.P.Val</b> | <b>classes</b> |
|-------------|-------------|-------------------|--------------|-------------|----------------|----------------|------------------|----------------|
| XLOC_010448 | XLOC_010448 | Up                | 2.314319     | 4.973698    | -0.80642       | 4.45E-06       | 0.008746         | u              |
| XLOC_000549 | XLOC_000549 | Up                | 1.48123      | 2.791867    | 3.825912       | 8.97E-06       | 0.009413         | u              |
| XLOC_013715 | XLOC_013715 | Up                | 1.351881     | 2.552447    | 0.496467       | 2.26E-05       | 0.011576         | u              |
| XLOC_031464 | XLOC_031464 | Up                | 1.125345     | 2.181537    | 3.438429       | 2.37E-05       | 0.011576         | u              |
| XLOC_022331 | XLOC_022331 | Up                | 2.561897     | 5.904836    | -2.16746       | 2.98E-05       | 0.012791         | u              |
| XLOC_007334 | XLOC_007334 | Up                | 0.741704     | 1.67215     | 5.457617       | 4.08E-05       | 0.013607         | u              |
| XLOC_037273 | XLOC_037273 | Up                | 1.015311     | 2.021339    | 3.327351       | 5.30E-05       | 0.015496         | u              |
| XLOC_028428 | XLOC_028428 | Up                | 1.365042     | 2.575838    | -0.91402       | 7.34E-05       | 0.017213         | x              |
| XLOC_020248 | XLOC_020248 | Up                | 2.454472     | 5.481126    | -2.60335       | 0.000115       | 0.018214         | u              |
| XLOC_007734 | XLOC_007734 | Up                | 1.945583     | 3.851935    | -1.47961       | 0.000116       | 0.018272         | u              |
| XLOC_008534 | XLOC_008534 | Up                | 1.002527     | 2.003507    | 0.353877       | 0.000161       | 0.019892         | u              |
| XLOC_000634 | XLOC_000634 | Up                | 0.586385     | 1.50148     | 5.13006        | 0.000255       | 0.022499         | u              |
| XLOC_019806 | XLOC_019806 | Up                | 1.036558     | 2.051328    | 0.845087       | 0.000262       | 0.022681         | u              |
| XLOC_026280 | XLOC_026280 | Up                | 1.534385     | 2.896649    | -0.59808       | 0.000289       | 0.023988         | u              |
| XLOC_008868 | XLOC_008868 | Up                | 3.035247     | 8.197855    | -4.5979        | 0.000356       | 0.025417         | u              |
| XLOC_015577 | XLOC_015577 | Up                | 0.955376     | 1.939085    | 0.692593       | 0.000361       | 0.025417         | x              |
| XLOC_008391 | XLOC_008391 | Up                | 0.734433     | 1.663744    | 1.6392         | 0.000442       | 0.026572         | u              |
| XLOC_029617 | XLOC_029617 | Up                | 0.43282      | 1.349869    | 8.485714       | 0.000475       | 0.027009         | u              |
| XLOC_006854 | XLOC_006854 | Up                | 2.650058     | 6.276925    | -3.41202       | 0.000636       | 0.029365         | u              |
| XLOC_034906 | XLOC_034906 | Up                | 1.107838     | 2.155225    | 0.526209       | 0.000751       | 0.030602         | u              |
| XLOC_004995 | XLOC_004995 | Up                | 0.642539     | 1.561074    | 2.388146       | 0.000925       | 0.031829         | u              |
| XLOC_011981 | XLOC_011981 | Up                | 1.050279     | 2.07093     | 1.942647       | 0.000966       | 0.03225          | u              |
| XLOC_027341 | XLOC_027341 | Up                | 1.294521     | 2.452955    | -1.42291       | 0.001065       | 0.032721         | u              |
| XLOC_003494 | XLOC_003494 | Up                | 2.457293     | 5.491853    | -2.77368       | 0.001167       | 0.033173         | u              |
| XLOC_028688 | XLOC_028688 | Up                | 0.419283     | 1.337263    | 6.852038       | 0.001114       | 0.033173         | u              |
| XLOC_006855 | XLOC_006855 | Up                | 1.358119     | 2.563507    | -1.5097        | 0.00121        | 0.033507         | u              |
| XLOC_010971 | XLOC_010971 | Up                | 4.237334     | 18.861      | -4.09862       | 0.001255       | 0.033634         | u              |
| XLOC_016513 | XLOC_016513 | Up                | 0.581835     | 1.496752    | 1.891336       | 0.001328       | 0.034524         | u              |
| XLOC_008551 | XLOC_008551 | Up                | 2.363265     | 5.145335    | -0.59816       | 0.00143        | 0.035327         | u              |
| XLOC_015535 | XLOC_015535 | Up                | 0.401107     | 1.320521    | 5.321998       | 0.001487       | 0.035661         | u              |
| XLOC_010035 | XLOC_010035 | Up                | 0.805639     | 1.747919    | 0.397939       | 0.001863       | 0.038782         | x u            |
| XLOC_019718 | XLOC_019718 | Up                | 0.468946     | 1.384098    | 2.654318       | 0.002468       | 0.043258         | u              |
| XLOC_013602 | XLOC_013602 | Up                | 0.518949     | 1.432911    | 3.164743       | 0.002857       | 0.044993         | u              |
| XLOC_034616 | XLOC_034616 | Up                | 0.411102     | 1.329702    | 3.787673       | 0.003132       | 0.04655          | u              |
| XLOC_036151 | XLOC_036151 | Up                | 0.356448     | 1.28027     | 4.588407       | 0.003233       | 0.047083         | u              |
| XLOC_008444 | XLOC_008444 | Up                | 1.152489     | 2.222971    | -1.79176       | 0.003277       | 0.047444         | x              |
| XLOC_031593 | XLOC_031593 | Up                | 2.182456     | 4.539255    | -1.88431       | 0.00344        | 0.048277         | u              |
| XLOC_002282 | XLOC_002282 | Up                | 0.488084     | 1.402581    | 3.649477       | 0.003472       | 0.048459         | u              |
| XLOC_034750 | XLOC_034750 | Up                | 1.24701      | 2.373489    | -2.26098       | 0.003701       | 0.049726         | u              |
| <b>ID</b>   | <b>XLOC</b> | <b>Regulation</b> | <b>logFC</b> | <b>Fold</b> | <b>AveExpr</b> | <b>P.Value</b> | <b>adj.P.Val</b> | <b>classes</b> |
| XLOC_019771 | XLOC_019771 | Down              | -1.60008     | 3.031596    | 0.764752       | 2.58E-05       | 0.011874         | x              |
| XLOC_028544 | XLOC_028544 | Down              | -2.19159     | 4.568074    | 1.276436       | 3.08E-05       | 0.012791         | u              |
| XLOC_020954 | XLOC_020954 | Down              | -1.20291     | 2.302033    | 3.302307       | 3.26E-05       | 0.013101         | x u            |
| XLOC_038703 | XLOC_038703 | Down              | -1.07834     | 2.111601    | 1.528166       | 6.37E-05       | 0.016354         | x              |
| XLOC_034020 | XLOC_034020 | Down              | -1.42395     | 2.683193    | 0.118686       | 0.000105       | 0.017815         | u              |
| XLOC_011701 | XLOC_011701 | Down              | -1.55817     | 2.944798    | -0.6072        | 0.00014        | 0.019331         | x u            |
| XLOC_029225 | XLOC_029225 | Down              | -0.91838     | 1.889995    | 3.259011       | 0.000133       | 0.019331         | u              |

|             |             |      |          |          |          |          |          |     |
|-------------|-------------|------|----------|----------|----------|----------|----------|-----|
| XLOC_015709 | XLOC_015709 | Down | -0.65858 | 1.578523 | 4.214033 | 0.000189 | 0.020687 | u   |
| XLOC_037930 | XLOC_037930 | Down | -0.91678 | 1.887897 | 0.650216 | 0.000208 | 0.02087  | x   |
| XLOC_035831 | XLOC_035831 | Down | -0.96319 | 1.949611 | 1.510238 | 0.000213 | 0.021185 | u   |
| XLOC_016616 | XLOC_016616 | Down | -0.99652 | 1.995179 | 1.54494  | 0.00029  | 0.023988 | u   |
| XLOC_005277 | XLOC_005277 | Down | -1.07708 | 2.109767 | -0.07309 | 0.000354 | 0.025417 | u   |
| XLOC_027054 | XLOC_027054 | Down | -0.76348 | 1.697584 | 2.894897 | 0.000404 | 0.026073 | x   |
| XLOC_005162 | XLOC_005162 | Down | -1.02218 | 2.030979 | -0.37811 | 0.000438 | 0.026535 | u   |
| XLOC_036461 | XLOC_036461 | Down | -0.78761 | 1.726207 | 4.277073 | 0.000456 | 0.02674  | u x |
| XLOC_034816 | XLOC_034816 | Down | -0.55938 | 1.473639 | 5.670942 | 0.000497 | 0.027437 | x   |
| XLOC_022273 | XLOC_022273 | Down | -0.8154  | 1.759782 | 1.045996 | 0.000535 | 0.027901 | x u |
| XLOC_000763 | XLOC_000763 | Down | -0.83107 | 1.779005 | 2.42823  | 0.000578 | 0.028465 | x   |
| XLOC_032127 | XLOC_032127 | Down | -0.81676 | 1.761445 | 0.985533 | 0.000587 | 0.028563 | u   |
| XLOC_036316 | XLOC_036316 | Down | -0.93607 | 1.913307 | -0.07464 | 0.000602 | 0.028933 | u x |
| XLOC_037070 | XLOC_037070 | Down | -0.98107 | 1.973933 | 0.995139 | 0.00064  | 0.029366 | u   |
| XLOC_022418 | XLOC_022418 | Down | -0.88567 | 1.84762  | -0.19779 | 0.000646 | 0.02946  | u   |
| XLOC_034742 | XLOC_034742 | Down | -0.87497 | 1.833975 | 3.721299 | 0.000657 | 0.029524 | u x |
| XLOC_023840 | XLOC_023840 | Down | -0.7613  | 1.695018 | 2.179291 | 0.000683 | 0.029953 | x u |
| XLOC_003146 | XLOC_003146 | Down | -1.20636 | 2.307551 | 1.895551 | 0.0007   | 0.030105 | u   |
| XLOC_007275 | XLOC_007275 | Down | -0.98054 | 1.973209 | 2.266201 | 0.0007   | 0.030105 | o   |
| XLOC_014904 | XLOC_014904 | Down | -1.91772 | 3.778265 | -1.04713 | 0.000719 | 0.030405 | u   |
| XLOC_009975 | XLOC_009975 | Down | -0.74206 | 1.672565 | 1.189878 | 0.000732 | 0.030532 | x u |
| XLOC_019476 | XLOC_019476 | Down | -1.00725 | 2.010074 | 3.093329 | 0.00077  | 0.030602 | u   |
| XLOC_036848 | XLOC_036848 | Down | -0.98384 | 1.977717 | -0.37233 | 0.000756 | 0.030602 | u   |
| XLOC_027674 | XLOC_027674 | Down | -0.90306 | 1.870032 | 1.247379 | 0.000774 | 0.030602 | u   |
| XLOC_020879 | XLOC_020879 | Down | -0.83735 | 1.786761 | 1.818534 | 0.00077  | 0.030602 | u   |
| XLOC_011465 | XLOC_011465 | Down | -0.80243 | 1.744032 | 3.675404 | 0.000774 | 0.030602 | x   |
| XLOC_024020 | XLOC_024020 | Down | -0.77897 | 1.715909 | 1.151171 | 0.000747 | 0.030602 | u   |
| XLOC_022173 | XLOC_022173 | Down | -0.80996 | 1.753161 | 1.852383 | 0.0008   | 0.030779 | u   |
| XLOC_035792 | XLOC_035792 | Down | -0.69862 | 1.622951 | 4.670852 | 0.000849 | 0.031552 | x   |
| XLOC_000783 | XLOC_000783 | Down | -0.58954 | 1.504765 | 5.840444 | 0.00085  | 0.031552 | x   |
| XLOC_025189 | XLOC_025189 | Down | -0.87834 | 1.838264 | 2.262243 | 0.000855 | 0.03163  | u   |
| XLOC_034285 | XLOC_034285 | Down | -1.00593 | 2.008237 | 1.986357 | 0.000866 | 0.031673 | u   |
| XLOC_014743 | XLOC_014743 | Down | -1.27473 | 2.419527 | -1.7331  | 0.000899 | 0.031829 | u   |
| XLOC_025089 | XLOC_025089 | Down | -1.10824 | 2.155826 | -0.9945  | 0.000896 | 0.031829 | u   |
| XLOC_014202 | XLOC_014202 | Down | -0.80473 | 1.746821 | 0.526974 | 0.000911 | 0.031829 | u   |
| XLOC_012082 | XLOC_012082 | Down | -0.62833 | 1.545777 | 2.188797 | 0.000905 | 0.031829 | u   |
| XLOC_026952 | XLOC_026952 | Down | -0.96598 | 1.953397 | 2.530265 | 0.000951 | 0.032134 | x   |
| XLOC_002219 | XLOC_002219 | Down | -1.08822 | 2.126112 | -0.29723 | 0.000961 | 0.032184 | x   |
| XLOC_005801 | XLOC_005801 | Down | -1.25946 | 2.394067 | -1.70972 | 0.000999 | 0.032327 | u   |
| XLOC_018693 | XLOC_018693 | Down | -0.83707 | 1.78642  | 2.51624  | 0.001014 | 0.032354 | x   |
| XLOC_001474 | XLOC_001474 | Down | -0.62768 | 1.545079 | 3.843364 | 0.001014 | 0.032354 | x   |
| XLOC_015705 | XLOC_015705 | Down | -2.05159 | 4.145633 | -3.1992  | 0.001039 | 0.03253  | u   |
| XLOC_008545 | XLOC_008545 | Down | -1.77185 | 3.41492  | 0.819291 | 0.001058 | 0.032626 | u   |
| XLOC_001068 | XLOC_001068 | Down | -0.66829 | 1.589186 | 3.210357 | 0.001054 | 0.032626 | u   |
| XLOC_022171 | XLOC_022171 | Down | -0.96339 | 1.949885 | 0.930083 | 0.001132 | 0.033173 | u   |
| XLOC_021046 | XLOC_021046 | Down | -1.07298 | 2.103774 | -1.49399 | 0.001232 | 0.033507 | u   |
| XLOC_027452 | XLOC_027452 | Down | -0.97009 | 1.958963 | -0.9473  | 0.001237 | 0.033507 | x   |
| XLOC_010467 | XLOC_010467 | Down | -0.91599 | 1.886863 | 0.527084 | 0.001228 | 0.033507 | u   |
| XLOC_022975 | XLOC_022975 | Down | -0.79552 | 1.735698 | 1.172789 | 0.001239 | 0.033507 | x u |
| XLOC_000055 | XLOC_000055 | Down | -0.68074 | 1.602967 | 1.466001 | 0.00122  | 0.033507 | u   |
| XLOC_000257 | XLOC_000257 | Down | -0.79269 | 1.732307 | 0.273842 | 0.001251 | 0.033599 | u   |
| XLOC_010830 | XLOC_010830 | Down | -0.9831  | 1.976715 | 0.754617 | 0.00137  | 0.034932 | u   |



|             |             |      |          |          |          |          |          |     |
|-------------|-------------|------|----------|----------|----------|----------|----------|-----|
| XLOC_007007 | XLOC_007007 | Down | -0.60989 | 1.526144 | 3.062938 | 0.001382 | 0.034998 | u   |
| XLOC_018006 | XLOC_018006 | Down | -0.71471 | 1.641151 | 2.806129 | 0.001385 | 0.035027 | u   |
| XLOC_026639 | XLOC_026639 | Down | -0.55311 | 1.467247 | 3.13624  | 0.001411 | 0.035232 | u   |
| XLOC_017638 | XLOC_017638 | Down | -0.60496 | 1.520932 | 2.953094 | 0.001467 | 0.03559  | x   |
| XLOC_018649 | XLOC_018649 | Down | -0.84082 | 1.791073 | 1.381041 | 0.001595 | 0.036875 | u   |
| XLOC_008730 | XLOC_008730 | Down | -0.88087 | 1.841491 | 2.020269 | 0.00168  | 0.037344 | x   |
| XLOC_014949 | XLOC_014949 | Down | -0.99792 | 1.997112 | -0.90915 | 0.001696 | 0.037547 | u   |
| XLOC_027655 | XLOC_027655 | Down | -1.04322 | 2.06082  | -1.43816 | 0.001699 | 0.037572 | o   |
| XLOC_005709 | XLOC_005709 | Down | -0.98936 | 1.98531  | -0.8753  | 0.001764 | 0.037998 | x   |
| XLOC_004779 | XLOC_004779 | Down | -0.69357 | 1.617275 | 4.425891 | 0.001788 | 0.038229 | x u |
| XLOC_034422 | XLOC_034422 | Down | -1.70344 | 3.256774 | -0.16492 | 0.001817 | 0.038496 | u   |
| XLOC_024479 | XLOC_024479 | Down | -0.60833 | 1.524491 | 2.442569 | 0.00183  | 0.038697 | u   |
| XLOC_026607 | XLOC_026607 | Down | -1.3882  | 2.617521 | -2.13406 | 0.001866 | 0.038782 | u   |
| XLOC_000539 | XLOC_000539 | Down | -0.92529 | 1.899069 | 1.956548 | 0.001866 | 0.038782 | x   |
| XLOC_008895 | XLOC_008895 | Down | -0.7627  | 1.696668 | 1.246832 | 0.001856 | 0.038782 | x   |
| XLOC_019277 | XLOC_019277 | Down | -0.85767 | 1.812108 | 0.244704 | 0.001889 | 0.038985 | u   |
| XLOC_012449 | XLOC_012449 | Down | -0.89865 | 1.864324 | 1.133135 | 0.001897 | 0.039101 | x   |
| XLOC_002995 | XLOC_002995 | Down | -0.82516 | 1.771726 | 2.179702 | 0.001998 | 0.039784 | x   |
| XLOC_010323 | XLOC_010323 | Down | -1.43994 | 2.713087 | -2.12113 | 0.002032 | 0.040073 | u   |
| XLOC_009129 | XLOC_009129 | Down | -1.81833 | 3.526736 | -0.78953 | 0.002056 | 0.040232 | u   |
| XLOC_008457 | XLOC_008457 | Down | -0.71824 | 1.64517  | 1.404121 | 0.002062 | 0.040272 | u x |
| XLOC_004561 | XLOC_004561 | Down | -0.73693 | 1.666628 | 4.076572 | 0.002116 | 0.040752 | x   |
| XLOC_020873 | XLOC_020873 | Down | -0.58504 | 1.500085 | 4.627907 | 0.002144 | 0.040896 | x u |
| XLOC_011766 | XLOC_011766 | Down | -0.73476 | 1.664115 | 2.393839 | 0.002193 | 0.041215 | x   |
| XLOC_011941 | XLOC_011941 | Down | -0.72079 | 1.648081 | 0.385361 | 0.00222  | 0.041384 | u   |
| XLOC_014932 | XLOC_014932 | Down | -0.76954 | 1.704723 | 0.934733 | 0.002293 | 0.041809 | u   |
| XLOC_017688 | XLOC_017688 | Down | -0.71512 | 1.641625 | 1.598516 | 0.002393 | 0.042649 | u x |
| XLOC_002514 | XLOC_002514 | Down | -1.22444 | 2.336651 | -1.61384 | 0.002403 | 0.042711 | u   |
| XLOC_005186 | XLOC_005186 | Down | -0.81834 | 1.763381 | 1.030301 | 0.002408 | 0.042761 | x u |
| XLOC_024265 | XLOC_024265 | Down | -0.93202 | 1.907941 | 2.35428  | 0.002619 | 0.043689 | u   |
| XLOC_033696 | XLOC_033696 | Down | -0.84703 | 1.798795 | 0.398422 | 0.002615 | 0.043689 | u   |
| XLOC_037309 | XLOC_037309 | Down | -0.7589  | 1.692199 | 0.489607 | 0.002621 | 0.043689 | u   |
| XLOC_008404 | XLOC_008404 | Down | -0.66211 | 1.582391 | 2.122125 | 0.002717 | 0.044223 | x   |
| XLOC_004944 | XLOC_004944 | Down | -0.93136 | 1.90707  | -0.75639 | 0.002753 | 0.04447  | x   |
| XLOC_020478 | XLOC_020478 | Down | -0.62613 | 1.543421 | 2.489785 | 0.00285  | 0.044974 | x   |
| XLOC_018560 | XLOC_018560 | Down | -0.67357 | 1.595018 | 0.295176 | 0.002872 | 0.045074 | u   |
| XLOC_009292 | XLOC_009292 | Down | -0.5978  | 1.513409 | 0.712278 | 0.002904 | 0.04532  | u   |
| XLOC_007484 | XLOC_007484 | Down | -0.85724 | 1.811575 | -0.05198 | 0.003006 | 0.045757 | x   |
| XLOC_008546 | XLOC_008546 | Down | -2.59514 | 6.04247  | -3.16807 | 0.003022 | 0.045945 | u   |
| XLOC_010428 | XLOC_010428 | Down | -0.71931 | 1.646398 | 0.831949 | 0.003051 | 0.046108 | x   |
| XLOC_004622 | XLOC_004622 | Down | -0.43618 | 1.353017 | 3.991383 | 0.003073 | 0.046235 | x   |
| XLOC_032472 | XLOC_032472 | Down | -1.01699 | 2.023697 | 0.760867 | 0.003092 | 0.046308 | u   |
| XLOC_000467 | XLOC_000467 | Down | -0.60165 | 1.517447 | 1.643922 | 0.003323 | 0.047694 | x u |
| XLOC_010007 | XLOC_010007 | Down | -0.73507 | 1.664483 | 1.763161 | 0.00337  | 0.047809 | x   |
| XLOC_011987 | XLOC_011987 | Down | -0.50781 | 1.42189  | 1.772613 | 0.003476 | 0.048459 | x   |
| XLOC_020962 | XLOC_020962 | Down | -1.19006 | 2.281624 | -0.15226 | 0.003559 | 0.048985 | u   |
| XLOC_021045 | XLOC_021045 | Down | -0.61097 | 1.527289 | 2.593975 | 0.003556 | 0.048985 | u   |
| XLOC_025269 | XLOC_025269 | Down | -0.5826  | 1.497544 | 4.050271 | 0.003568 | 0.048993 | u   |

## Supplemental table 6

### Genes overlapping with the list of Moran et al. [34]

| XLOC        | Moran ID   | chr   | Start Moran | Stop Moran | Start Transmap | Stop Transmap |
|-------------|------------|-------|-------------|------------|----------------|---------------|
| XLOC_000378 | HI-LNC568  | chr5  | 102118175   | 102120991  | 102117031      | 102118514     |
| XLOC_000607 | HI-LNC277  | chr1  | 161551566   | 161558346  | 161552261      | 161558202     |
| XLOC_001068 | HI-LNC401  | chr2  | 232175903   | 232177639  | 232175262      | 232177541     |
| XLOC_001159 | HI-LNC1161 | chr18 | 58336080    | 58341501   | 58339869       | 58341429      |
| XLOC_002184 | HI-LNC641  | chr6  | 147334874   | 147437676  | 147364244      | 147494967     |
| XLOC_002183 | HI-LNC641  | chr6  | 147334874   | 147437676  | 147425669      | 147439820     |
| XLOC_002905 | HI-LNC925  | chr12 | 61283482    | 61302209   | 61291304       | 61312645      |
| XLOC_003020 | HI-LNC639  | chr6  | 146177615   | 146178292  | 146177702      | 146193776     |
| XLOC_005117 | HI-LNC1135 | chr17 | 70490082    | 70492536   | 70489518       | 70490586      |
| XLOC_007547 | HI-LNC989  | chr14 | 76564788    | 76568092   | 76566271       | 76574722      |
| XLOC_007775 | HI-LNC1000 | chr14 | 104142143   | 104143933  | 104142290      | 104144502     |
| XLOC_008388 | HI-LNC607  | chr6  | 16869806    | 16874960   | 16869928       | 16872482      |
| XLOC_008389 | HI-LNC607  | chr6  | 16869806    | 16874960   | 16873845       | 16874703      |
| XLOC_008636 | HI-LNC553  | chr5  | 72829159    | 72829881   | 72827575       | 72829867      |
| XLOC_008707 | HI-LNC548  | chr5  | 50296009    | 50308204   | 50292484       | 50297592      |
| XLOC_009292 | HI-LNC548  | chr5  | 50296009    | 50308204   | 50297631       | 50302088      |
| XLOC_011053 | HI-LNC969  | chr13 | 95123124    | 95127184   | 95126480       | 95127052      |
| XLOC_011491 | HI-LNC537  | chr5  | 10405713    | 10406827   | 10406097       | 10406510      |
| XLOC_011922 | HI-LNC920  | chr12 | 48963717    | 48965449   | 48963722       | 48966340      |
| XLOC_012082 | HI-LNC745  | chr8  | 104566589   | 104582151  | 104576726      | 104581137     |
| XLOC_012441 | HI-LNC1275 | chr22 | 43922535    | 43938389   | 43898740       | 43938326      |
| XLOC_014712 | HI-LNC77   | chr6  | 43966418    | 43980669   | 43972620       | 43990399      |
| XLOC_014802 | HI-LNC570  | chr5  | 107745699   | 107752110  | 107749107      | 107751822     |
| XLOC_014932 | HI-LNC333  | chr2  | 47987466    | 47988690   | 47987270       | 47987658      |
| XLOC_015022 | HI-LNC567  | chr5  | 98292760    | 98297936   | 98292734       | 98293541      |
| XLOC_015492 | HI-LNC77   | chr6  | 43966418    | 43980669   | 43975227       | 43993373      |
| XLOC_016517 | HI-LNC1164 | chr18 | 72458225    | 72471063   | 72459823       | 72464181      |
| XLOC_017840 | HI-LNC865  | chr11 | 61112528    | 61132302   | 61125807       | 61133825      |
| XLOC_017969 | HI-LNC819  | chr10 | 89406042    | 89409455   | 89369897       | 89409447      |
| XLOC_018002 | HI-LNC822  | chr10 | 95351492    | 95355522   | 95351884       | 95353470      |
| XLOC_019208 | HI-LNC862  | chr11 | 43557305    | 43619162   | 43532265       | 43559414      |
| XLOC_019476 | HI-LNC1228 | chr20 | 22488058    | 22507515   | 22433986       | 22498945      |
| XLOC_020471 | HI-LNC863  | chr11 | 43622102    | 43627312   | 43622257       | 43628877      |
| XLOC_020734 | HI-LNC1228 | chr20 | 22488058    | 22507515   | 22489187       | 22497542      |
| XLOC_020962 | HI-LNC25   | chr20 | 38066346    | 38082186   | 38075511       | 38077917      |
| XLOC_021112 | HI-LNC1241 | chr20 | 61616032    | 61622561   | 61620130       | 61624080      |
| XLOC_022873 | HI-LNC256  | chr1  | 108544498   | 108546760  | 108544534      | 108557545     |
| XLOC_023633 | HI-LNC740  | chr8  | 95718761    | 95722245   | 95719530       | 95720663      |
| XLOC_023846 | HI-LNC780  | chr9  | 111300415   | 111304868  | 111302057      | 111309613     |
| XLOC_024101 | HI-LNC232  | chr1  | 43197435    | 43214586   | 43197281       | 43201999      |
| XLOC_024386 | HI-LNC205  | chr1  | 9165045     | 9168248    | 9143829        | 9165882       |
| XLOC_024473 | HI-LNC730  | chr8  | 61975545    | 61998369   | 61975986       | 61981926      |
| XLOC_024734 | HI-LNC782  | chr9  | 114287664   | 114288774  | 114242241      | 114288523     |
| XLOC_026157 | HI-LNC321  | chr2  | 28807932    | 28812738   | 28811926       | 28827944      |
| XLOC_026780 | HI-LNC659  | chr7  | 5431572     | 5437419    | 5429778        | 5435128       |
| XLOC_027418 | HI-LNC943  | chr12 | 119291544   | 119293808  | 119291601      | 119298328     |
| XLOC_028700 | HI-LNC342  | chr2  | 69724714    | 69801511   | 69775382       | 69776030      |
| XLOC_028832 | HI-LNC809  | chr10 | 44773186    | 44775022   | 44773788       | 44777752      |
| XLOC_029225 | HI-LNC14   | chr7  | 127594961   | 127652181  | 127570130      | 127605065     |

|             |            |       |           |           |           |           |
|-------------|------------|-------|-----------|-----------|-----------|-----------|
| XLOC_030688 | HI-LNC1199 | chr19 | 45165698  | 45168671  | 45165823  | 45166111  |
| XLOC_031682 | HI-LNC843  | chr11 | 1287569   | 1288723   | 1287579   | 1287775   |
| XLOC_031821 | HI-LNC1216 | chr19 | 63606046  | 63611874  | 63607244  | 63647229  |
| XLOC_032127 | HI-LNC1180 | chr19 | 36532791  | 36556765  | 36532786  | 36547598  |
| XLOC_034238 | HI-LNC1072 | chr16 | 88084761  | 88094621  | 88084539  | 88089851  |
| XLOC_034728 | HI-LNC1059 | chr16 | 54780209  | 54782470  | 54715544  | 54782456  |
| XLOC_035676 | HI-LNC665  | chr7  | 35701298  | 35705499  | 35701408  | 35706391  |
| XLOC_035945 | HI-LNC1019 | chr15 | 70548686  | 70553720  | 70550770  | 70553858  |
| XLOC_036461 | HI-LNC1171 | chr19 | 10623127  | 10625747  | 10625546  | 10625894  |
| XLOC_036650 | HI-LNC888  | chr11 | 111645149 | 111648862 | 111647518 | 111654415 |
| XLOC_037284 | HI-LNC427  | chr3  | 38466932  | 38469703  | 38469287  | 38470209  |
| XLOC_037990 | HI-LNC1281 | chrX  | 45572443  | 45596484  | 45596010  | 45599223  |

**Supplemental table 7****List of differentially expressed novel lncRNAs between HFD and ND mice (excluding HD3)**

u= intergenic transcripts, x=exonic overlap with reference on the opposite strand

| ID          | XLOC        | Regulation | logFC    | Fold change | AveExpr  | P.Value  | adj.P.Val | classes |
|-------------|-------------|------------|----------|-------------|----------|----------|-----------|---------|
| XLOC_000549 | XLOC_000549 | Up         | 1.380937 | 2.604375388 | 3.640885 | 1.76E-06 | 0.000582  | u       |
| XLOC_010448 | XLOC_010448 | Up         | 2.398872 | 5.273906077 | -1.00815 | 1.96E-06 | 0.000612  | u       |
| XLOC_031464 | XLOC_031464 | Up         | 1.129571 | 2.187936852 | 3.32685  | 9.01E-06 | 0.00131   | u       |
| XLOC_029617 | XLOC_029617 | Up         | 0.503165 | 1.417319379 | 8.468925 | 9.41E-06 | 0.00134   | u       |
| XLOC_022331 | XLOC_022331 | Up         | 2.708479 | 6.536321327 | -2.36982 | 1.10E-05 | 0.001478  | u       |
| XLOC_000634 | XLOC_000634 | Up         | 0.660435 | 1.580558678 | 5.099281 | 1.11E-05 | 0.001478  | u       |
| XLOC_007334 | XLOC_007334 | Up         | 0.743285 | 1.673983431 | 5.384102 | 1.32E-05 | 0.00155   | u       |
| XLOC_013715 | XLOC_013715 | Up         | 1.393353 | 2.626884457 | 0.376411 | 1.74E-05 | 0.001813  | u       |
| XLOC_010971 | XLOC_010971 | Up         | 4.82865  | 28.4163637  | -4.31713 | 1.94E-05 | 0.001887  | u       |
| XLOC_007734 | XLOC_007734 | Up         | 2.12894  | 4.373959778 | -1.60537 | 2.29E-05 | 0.002052  | u       |
| XLOC_037273 | XLOC_037273 | Up         | 0.943528 | 1.923224987 | 3.199203 | 2.58E-05 | 0.00221   | u       |
| XLOC_019806 | XLOC_019806 | Up         | 1.180472 | 2.266509204 | 0.794755 | 2.67E-05 | 0.00226   | u       |
| XLOC_020248 | XLOC_020248 | Up         | 2.587447 | 6.010343411 | -2.80251 | 6.78E-05 | 0.003971  | u       |
| XLOC_008551 | XLOC_008551 | Up         | 2.710381 | 6.544943924 | -0.70201 | 0.000124 | 0.005422  | u       |
| XLOC_028428 | XLOC_028428 | Up         | 1.340263 | 2.531974485 | -1.05957 | 0.000187 | 0.006567  | x       |
| XLOC_031593 | XLOC_031593 | Up         | 2.550804 | 5.859607394 | -1.97695 | 0.000204 | 0.006763  | u       |
| XLOC_024419 | XLOC_024419 | Up         | 1.403909 | 2.646176837 | -1.0111  | 0.000207 | 0.006833  | u       |
| XLOC_026280 | XLOC_026280 | Up         | 1.300294 | 2.462790364 | -0.83709 | 0.000249 | 0.0075    | u       |
| XLOC_004995 | XLOC_004995 | Up         | 0.705776 | 1.631021644 | 2.347999 | 0.00031  | 0.008445  | u       |
| XLOC_008534 | XLOC_008534 | Up         | 0.965108 | 1.95220984  | 0.239862 | 0.000364 | 0.009135  | u       |
| XLOC_008868 | XLOC_008868 | Up         | 3.224025 | 9.343901779 | -4.83616 | 0.000381 | 0.009267  | u       |
| XLOC_015577 | XLOC_015577 | Up         | 0.974232 | 1.964595576 | 0.603733 | 0.000417 | 0.009684  | x       |
| XLOC_034906 | XLOC_034906 | Up         | 1.154602 | 2.226228595 | 0.432118 | 0.000537 | 0.011071  | u       |
| XLOC_016371 | XLOC_016371 | Up         | 0.534862 | 1.448803364 | 5.607633 | 0.000547 | 0.011178  | u       |
| XLOC_006854 | XLOC_006854 | Up         | 2.698943 | 6.493261824 | -3.66086 | 0.000677 | 0.012493  | u       |
| XLOC_028688 | XLOC_028688 | Up         | 0.407546 | 1.326428048 | 6.80566  | 0.000763 | 0.013284  | u       |
| XLOC_008391 | XLOC_008391 | Up         | 0.687359 | 1.610332962 | 1.548455 | 0.00082  | 0.013791  | u       |
| XLOC_003494 | XLOC_003494 | Up         | 2.515084 | 5.716309329 | -2.99333 | 0.000915 | 0.014688  | u       |
| XLOC_011981 | XLOC_011981 | Up         | 0.999015 | 1.998635358 | 1.818511 | 0.00097  | 0.015214  | u       |
| XLOC_017840 | XLOC_017840 | Up         | 0.418569 | 1.336601246 | 4.176642 | 0.0011   | 0.016383  | u       |
| XLOC_014872 | XLOC_014872 | Up         | 0.410765 | 1.32939027  | 5.205512 | 0.001136 | 0.016673  | u       |
| XLOC_034750 | XLOC_034750 | Up         | 1.464357 | 2.759405322 | -2.30755 | 0.001153 | 0.016759  | u       |
| XLOC_018066 | XLOC_018066 | Up         | 1.17659  | 2.260418545 | -0.58568 | 0.001261 | 0.01754   | u       |
| XLOC_015535 | XLOC_015535 | Up         | 0.351481 | 1.275870121 | 5.263489 | 0.001341 | 0.018163  | u       |
| XLOC_016513 | XLOC_016513 | Up         | 0.60098  | 1.516746018 | 1.840006 | 0.001421 | 0.018716  | u       |
| XLOC_008444 | XLOC_008444 | Up         | 1.316289 | 2.490246734 | -1.84785 | 0.001544 | 0.019573  | x       |
| XLOC_002282 | XLOC_002282 | Up         | 0.517057 | 1.431033085 | 3.61164  | 0.001798 | 0.021356  | u       |
| XLOC_019718 | XLOC_019718 | Up         | 0.488165 | 1.402659667 | 2.614647 | 0.002088 | 0.023064  | u       |
| XLOC_006855 | XLOC_006855 | Up         | 1.316258 | 2.490193931 | -1.66047 | 0.002337 | 0.024616  | u       |
| XLOC_010035 | XLOC_010035 | Up         | 0.823172 | 1.769291726 | 0.322945 | 0.002541 | 0.025758  | x u     |
| XLOC_004793 | XLOC_004793 | Up         | 0.925114 | 1.898834377 | -0.13261 | 0.002756 | 0.026877  | u       |
| XLOC_027341 | XLOC_027341 | Up         | 1.175887 | 2.259317737 | -1.59737 | 0.002814 | 0.027109  | u       |
| XLOC_036151 | XLOC_036151 | Up         | 0.342384 | 1.267849571 | 4.547593 | 0.002961 | 0.027846  | u       |
| XLOC_034616 | XLOC_034616 | Up         | 0.403472 | 1.322687001 | 3.743769 | 0.002981 | 0.028003  | u       |
| XLOC_003492 | XLOC_003492 | Up         | 0.557878 | 1.472102496 | 1.669814 | 0.003151 | 0.028853  | u       |
| XLOC_028816 | XLOC_028816 | Up         | 0.363924 | 1.286921159 | 7.54088  | 0.003729 | 0.031669  | u       |
| XLOC_013602 | XLOC_013602 | Up         | 0.435885 | 1.352740156 | 3.08182  | 0.004329 | 0.034424  | u       |
| XLOC_000515 | XLOC_000515 | Up         | 0.987983 | 1.983410134 | 0.063509 | 0.004945 | 0.0373    | u       |
| XLOC_010698 | XLOC_010698 | Up         | 0.40591  | 1.324924325 | 3.971143 | 0.004975 | 0.037415  | u       |
| XLOC_011708 | XLOC_011708 | Up         | 0.501327 | 1.415514971 | 2.814948 | 0.00498  | 0.037429  | u       |

|             |             |    |          |             |          |          |          |     |
|-------------|-------------|----|----------|-------------|----------|----------|----------|-----|
| XLOC_007700 | XLOC_007700 | Up | 0.245771 | 1.18572614  | 6.297621 | 0.005654 | 0.040338 | x   |
| XLOC_013698 | XLOC_013698 | Up | 1.395215 | 2.630277311 | -2.37344 | 0.006077 | 0.042138 | x u |
| XLOC_000898 | XLOC_000898 | Up | 0.362986 | 1.286085312 | 6.606055 | 0.006104 | 0.042277 | x   |
| XLOC_019724 | XLOC_019724 | Up | 0.486882 | 1.401412779 | 2.736638 | 0.006157 | 0.042506 | u   |
| XLOC_036229 | XLOC_036229 | Up | 0.52024  | 1.434193671 | 1.45639  | 0.006884 | 0.045415 | x   |
| XLOC_007023 | XLOC_007023 | Up | 0.663247 | 1.583643025 | 1.020597 | 0.006943 | 0.045627 | x u |
| XLOC_019726 | XLOC_019726 | Up | 0.393071 | 1.313185984 | 2.885379 | 0.007269 | 0.04697  | u   |
| XLOC_000009 | XLOC_000009 | Up | 1.217786 | 2.325894508 | -2.30061 | 0.007473 | 0.0476   | u   |

| ID          | XLOC        | Regulation | logFC    | Fold change | AveExpr  | P.Value  | adj.P.Val | classes |
|-------------|-------------|------------|----------|-------------|----------|----------|-----------|---------|
| XLOC_028544 | XLOC_028544 | Down       | -2.58671 | 6.00725367  | 1.351558 | 2.08E-07 | 0.000221  | u       |
| XLOC_003146 | XLOC_003146 | Down       | -1.485   | 2.799180736 | 1.911606 | 1.04E-05 | 0.001427  | u       |
| XLOC_034285 | XLOC_034285 | Down       | -1.25228 | 2.382183608 | 1.995699 | 1.33E-05 | 0.00155   | u       |
| XLOC_038703 | XLOC_038703 | Down       | -1.18961 | 2.280911302 | 1.59478  | 1.93E-05 | 0.001887  | x       |
| XLOC_020954 | XLOC_020954 | Down       | -1.19598 | 2.291002486 | 3.423725 | 2.17E-05 | 0.001972  | x u     |
| XLOC_019771 | XLOC_019771 | Down       | -1.67501 | 3.193204902 | 0.89683  | 2.28E-05 | 0.002052  | x       |
| XLOC_015709 | XLOC_015709 | Down       | -0.70395 | 1.628960947 | 4.262943 | 5.51E-05 | 0.003527  | u       |
| XLOC_014904 | XLOC_014904 | Down       | -2.39851 | 5.272570585 | -1.02053 | 8.07E-05 | 0.004388  | u       |
| XLOC_025189 | XLOC_025189 | Down       | -1.03572 | 2.050138202 | 2.29155  | 9.42E-05 | 0.004744  | u       |
| XLOC_032946 | XLOC_032946 | Down       | -1.86893 | 3.65261291  | -0.865   | 0.00012  | 0.00535   | x       |
| XLOC_029225 | XLOC_029225 | Down       | -0.86443 | 1.820619367 | 3.370428 | 0.000142 | 0.005679  | u       |
| XLOC_019476 | XLOC_019476 | Down       | -1.14922 | 2.217934003 | 3.140859 | 0.000152 | 0.005854  | u       |
| XLOC_034422 | XLOC_034422 | Down       | -2.15562 | 4.455614067 | -0.15565 | 0.000154 | 0.005883  | u       |
| XLOC_034020 | XLOC_034020 | Down       | -1.23504 | 2.353880204 | 0.328727 | 0.00019  | 0.006602  | u       |
| XLOC_010467 | XLOC_010467 | Down       | -1.1086  | 2.156356215 | 0.548257 | 0.00019  | 0.006602  | u       |
| XLOC_022171 | XLOC_022171 | Down       | -1.14081 | 2.205052473 | 0.960247 | 0.000198 | 0.006685  | u       |
| XLOC_037070 | XLOC_037070 | Down       | -1.11675 | 2.168585482 | 1.042144 | 0.000201 | 0.006686  | u       |
| XLOC_005186 | XLOC_005186 | Down       | -1.01888 | 2.026343119 | 1.038121 | 0.00021  | 0.006914  | x u     |
| XLOC_015529 | XLOC_015529 | Down       | -1.03956 | 2.05560443  | 0.628551 | 0.000224 | 0.007129  | u       |
| XLOC_002219 | XLOC_002219 | Down       | -1.30413 | 2.469339966 | -0.26508 | 0.000233 | 0.007246  | x       |
| XLOC_036461 | XLOC_036461 | Down       | -0.82223 | 1.768135489 | 4.342228 | 0.000233 | 0.007246  | u x     |
| XLOC_020962 | XLOC_020962 | Down       | -1.53949 | 2.906926589 | -0.15995 | 0.000234 | 0.007246  | u       |
| XLOC_033969 | XLOC_033969 | Down       | -1.03647 | 2.051203076 | 0.60402  | 0.000256 | 0.007553  | x u     |
| XLOC_008545 | XLOC_008545 | Down       | -2.07278 | 4.206970533 | 0.887746 | 0.000318 | 0.008505  | u       |
| XLOC_018006 | XLOC_018006 | Down       | -0.81569 | 1.760145632 | 2.839272 | 0.000325 | 0.008612  | u       |
| XLOC_016616 | XLOC_016616 | Down       | -1.0082  | 2.011398476 | 1.638679 | 0.000325 | 0.008617  | u       |
| XLOC_034816 | XLOC_034816 | Down       | -0.54998 | 1.464067987 | 5.730467 | 0.000343 | 0.008881  | x       |
| XLOC_037930 | XLOC_037930 | Down       | -0.94665 | 1.927388459 | 0.730509 | 0.000372 | 0.009254  | x       |
| XLOC_000783 | XLOC_000783 | Down       | -0.61798 | 1.53472488  | 5.888526 | 0.000374 | 0.009254  | x       |
| XLOC_035831 | XLOC_035831 | Down       | -0.91561 | 1.886371328 | 1.622942 | 0.000381 | 0.009267  | u       |
| XLOC_011701 | XLOC_011701 | Down       | -1.39458 | 2.629116811 | -0.39356 | 0.000408 | 0.009564  | x u     |
| XLOC_012082 | XLOC_012082 | Down       | -0.69716 | 1.621310817 | 2.225862 | 0.000428 | 0.009845  | u       |
| XLOC_037068 | XLOC_037068 | Down       | -1.27996 | 2.428321508 | 0.051641 | 0.000463 | 0.010347  | u       |
| XLOC_027054 | XLOC_027054 | Down       | -0.74095 | 1.671279541 | 2.979059 | 0.000486 | 0.010596  | x       |
| XLOC_017688 | XLOC_017688 | Down       | -0.85451 | 1.808146639 | 1.618546 | 0.000487 | 0.010596  | u x     |
| XLOC_005162 | XLOC_005162 | Down       | -1.12776 | 2.185192161 | -0.31339 | 0.000518 | 0.010935  | u       |
| XLOC_008730 | XLOC_008730 | Down       | -0.99749 | 1.996527336 | 2.063752 | 0.000551 | 0.011216  | x       |
| XLOC_008457 | XLOC_008457 | Down       | -0.84374 | 1.794702594 | 1.4302   | 0.000579 | 0.011578  | u x     |
| XLOC_024489 | XLOC_024489 | Down       | -0.81706 | 1.761807274 | 1.211381 | 0.000585 | 0.011602  | u       |
| XLOC_001474 | XLOC_001474 | Down       | -0.65737 | 1.57720303  | 3.894712 | 0.000601 | 0.011759  | x       |
| XLOC_022173 | XLOC_022173 | Down       | -0.86732 | 1.82426831  | 1.912598 | 0.000602 | 0.011762  | u       |
| XLOC_020873 | XLOC_020873 | Down       | -0.64952 | 1.568642464 | 4.661872 | 0.000635 | 0.012015  | x u     |
| XLOC_009129 | XLOC_009129 | Down       | -2.21395 | 4.639431332 | -0.74841 | 0.000653 | 0.012239  | u       |
| XLOC_005277 | XLOC_005277 | Down       | -1.11227 | 2.161851828 | 0.02242  | 0.000678 | 0.012493  | u       |
| XLOC_035792 | XLOC_035792 | Down       | -0.69543 | 1.619363195 | 4.741905 | 0.000685 | 0.012546  | x       |

|             |             |      |          |             |          |          |          |     |
|-------------|-------------|------|----------|-------------|----------|----------|----------|-----|
| XLOC_020879 | XLOC_020879 | Down | -0.87726 | 1.836885499 | 1.886446 | 0.000712 | 0.01277  | u   |
| XLOC_036848 | XLOC_036848 | Down | -1.10455 | 2.150322391 | -0.31688 | 0.000713 | 0.012782 | u   |
| XLOC_024479 | XLOC_024479 | Down | -0.68355 | 1.606081803 | 2.475215 | 0.000742 | 0.013072 | u   |
| XLOC_024265 | XLOC_024265 | Down | -1.07745 | 2.110304446 | 2.393581 | 0.000776 | 0.013412 | u   |
| XLOC_034742 | XLOC_034742 | Down | -0.8154  | 1.759782628 | 3.829526 | 0.000785 | 0.013484 | u x |
| XLOC_000763 | XLOC_000763 | Down | -0.80954 | 1.75265679  | 2.519772 | 0.000789 | 0.013501 | x   |
| XLOC_023840 | XLOC_023840 | Down | -0.76182 | 1.695632984 | 2.254578 | 0.000872 | 0.014302 | x u |
| XLOC_009975 | XLOC_009975 | Down | -0.78205 | 1.719570773 | 1.250029 | 0.000904 | 0.01459  | x u |
| XLOC_038779 | XLOC_038779 | Down | -1.02265 | 2.031646573 | -0.24575 | 0.000908 | 0.01463  | x u |
| XLOC_011465 | XLOC_011465 | Down | -0.76444 | 1.698705544 | 3.768981 | 0.000917 | 0.014712 | x   |
| XLOC_024020 | XLOC_024020 | Down | -0.81768 | 1.762567371 | 1.214358 | 0.00093  | 0.014863 | u   |
| XLOC_022273 | XLOC_022273 | Down | -0.81364 | 1.757640678 | 1.127287 | 0.001002 | 0.015493 | x u |
| XLOC_030688 | XLOC_030688 | Down | -0.75449 | 1.687032338 | 1.432943 | 0.001032 | 0.015724 | u   |
| XLOC_017638 | XLOC_017638 | Down | -0.63832 | 1.55651582  | 3.001328 | 0.001052 | 0.015899 | x   |
| XLOC_007275 | XLOC_007275 | Down | -0.88706 | 1.849403595 | 2.397534 | 0.001134 | 0.016668 | o   |
| XLOC_013310 | XLOC_013310 | Down | -1.546   | 2.920072066 | -1.26593 | 0.001139 | 0.016676 | u   |
| XLOC_034176 | XLOC_034176 | Down | -1.28439 | 2.435792973 | -0.44471 | 0.001182 | 0.016936 | u   |
| XLOC_018693 | XLOC_018693 | Down | -0.83347 | 1.781961305 | 2.601414 | 0.001213 | 0.017205 | x   |
| XLOC_036048 | XLOC_036048 | Down | -0.9433  | 1.922915316 | 2.297411 | 0.001243 | 0.017413 | u   |
| XLOC_019277 | XLOC_019277 | Down | -0.97633 | 1.96745148  | 0.287307 | 0.001244 | 0.017413 | u   |
| XLOC_010428 | XLOC_010428 | Down | -0.84213 | 1.792694824 | 0.858122 | 0.001258 | 0.017515 | x   |
| XLOC_026952 | XLOC_026952 | Down | -0.93    | 1.905276688 | 2.6389   | 0.001292 | 0.017812 | x   |
| XLOC_004622 | XLOC_004622 | Down | -0.47724 | 1.392073622 | 4.020107 | 0.001295 | 0.01783  | x   |
| XLOC_027674 | XLOC_027674 | Down | -0.88688 | 1.84916908  | 1.342274 | 0.001298 | 0.017848 | u   |
| XLOC_004779 | XLOC_004779 | Down | -0.70766 | 1.63314934  | 4.488997 | 0.001324 | 0.018003 | x u |
| XLOC_005339 | XLOC_005339 | Down | -2.15527 | 4.454504997 | -2.6208  | 0.001351 | 0.018213 | u   |
| XLOC_008546 | XLOC_008546 | Down | -3.3184  | 9.975561863 | -3.16319 | 0.001363 | 0.018296 | u   |
| XLOC_021974 | XLOC_021974 | Down | -1.00282 | 2.003912155 | -0.02742 | 0.001397 | 0.018542 | u   |
| XLOC_032127 | XLOC_032127 | Down | -0.78191 | 1.719400952 | 1.079521 | 0.001417 | 0.018684 | u   |
| XLOC_014755 | XLOC_014755 | Down | -0.76469 | 1.699001925 | 1.185335 | 0.001463 | 0.019032 | u   |
| XLOC_000606 | XLOC_000606 | Down | -1.20897 | 2.311726642 | 0.834967 | 0.001484 | 0.019183 | u   |
| XLOC_027452 | XLOC_027452 | Down | -1.09898 | 2.142030826 | -0.89577 | 0.001489 | 0.019231 | x   |
| XLOC_001068 | XLOC_001068 | Down | -0.58041 | 1.495272017 | 3.308718 | 0.001524 | 0.019489 | u   |
| XLOC_034523 | XLOC_034523 | Down | -1.16198 | 2.237650777 | 1.009205 | 0.00154  | 0.019548 | u   |
| XLOC_033696 | XLOC_033696 | Down | -0.96283 | 1.94912972  | 0.439564 | 0.001553 | 0.019648 | u   |
| XLOC_011002 | XLOC_011002 | Down | -1.87024 | 3.655940391 | -2.43859 | 0.001569 | 0.019745 | u   |
| XLOC_012613 | XLOC_012613 | Down | -1.16481 | 2.242033098 | -0.81753 | 0.001656 | 0.020437 | u   |
| XLOC_011835 | XLOC_011835 | Down | -0.9935  | 1.99101012  | 0.142647 | 0.001686 | 0.020539 | u   |
| XLOC_025089 | XLOC_025089 | Down | -1.1816  | 2.268277833 | -0.90918 | 0.001739 | 0.020971 | u   |
| XLOC_022975 | XLOC_022975 | Down | -0.81216 | 1.755832825 | 1.245221 | 0.00175  | 0.021014 | x u |
| XLOC_005709 | XLOC_005709 | Down | -1.12396 | 2.179444425 | -0.82404 | 0.001805 | 0.021389 | x   |
| XLOC_036509 | XLOC_036509 | Down | -1.00473 | 2.006569328 | 0.544736 | 0.001841 | 0.021637 | x   |
| XLOC_013278 | XLOC_013278 | Down | -1.83955 | 3.578991595 | -2.14895 | 0.001876 | 0.021846 | x   |
| XLOC_026639 | XLOC_026639 | Down | -0.52902 | 1.442948574 | 3.200898 | 0.001881 | 0.021891 | u   |
| XLOC_037309 | XLOC_037309 | Down | -0.85765 | 1.812089956 | 0.528761 | 0.001895 | 0.021972 | u   |
| XLOC_007007 | XLOC_007007 | Down | -0.57539 | 1.490085364 | 3.135811 | 0.001952 | 0.022314 | u   |
| XLOC_008895 | XLOC_008895 | Down | -0.80988 | 1.753060847 | 1.305727 | 0.001962 | 0.022335 | x   |
| XLOC_020918 | XLOC_020918 | Down | -1.12006 | 2.17355345  | -0.04432 | 0.002027 | 0.022695 | u   |
| XLOC_000605 | XLOC_000605 | Down | -1.78887 | 3.455452767 | -0.05281 | 0.002041 | 0.022755 | u   |
| XLOC_014202 | XLOC_014202 | Down | -0.80294 | 1.744652251 | 0.607475 | 0.002056 | 0.022838 | u   |
| XLOC_036316 | XLOC_036316 | Down | -0.88659 | 1.848805194 | 0.036958 | 0.002082 | 0.023008 | u x |
| XLOC_028573 | XLOC_028573 | Down | -1.39206 | 2.624539449 | -1.314   | 0.002095 | 0.023113 | u   |
| XLOC_004944 | XLOC_004944 | Down | -1.07917 | 2.112815695 | -0.71719 | 0.002101 | 0.023126 | x   |
| XLOC_015705 | XLOC_015705 | Down | -2.28666 | 4.879246333 | -3.07853 | 0.002127 | 0.023246 | u   |
| XLOC_022418 | XLOC_022418 | Down | -0.87207 | 1.830291604 | -0.10399 | 0.00214  | 0.023334 | u   |

|             |             |      |          |             |          |          |          |     |
|-------------|-------------|------|----------|-------------|----------|----------|----------|-----|
| XLOC_001098 | XLOC_001098 | Down | -1.14923 | 2.217957784 | -1.02498 | 0.002239 | 0.023969 | u   |
| XLOC_010830 | XLOC_010830 | Down | -0.98006 | 1.97254409  | 0.853964 | 0.002257 | 0.0241   | u   |
| XLOC_008404 | XLOC_008404 | Down | -0.70549 | 1.630695742 | 2.172572 | 0.002302 | 0.024431 | x   |
| XLOC_026999 | XLOC_026999 | Down | -0.73119 | 1.660008952 | 0.663753 | 0.002317 | 0.024495 | u   |
| XLOC_001157 | XLOC_001157 | Down | -1.48307 | 2.795439153 | -2.11805 | 0.002359 | 0.024769 | u   |
| XLOC_006072 | XLOC_006072 | Down | -1.48937 | 2.807654756 | -2.01747 | 0.002362 | 0.024774 | u   |
| XLOC_000782 | XLOC_000782 | Down | -0.63974 | 1.558052582 | 1.933915 | 0.002416 | 0.02506  | u   |
| XLOC_004561 | XLOC_004561 | Down | -0.70609 | 1.631380288 | 4.16042  | 0.002445 | 0.025258 | x   |
| XLOC_024473 | XLOC_024473 | Down | -0.79951 | 1.740508506 | 0.562445 | 0.002466 | 0.0254   | u   |
| XLOC_036636 | XLOC_036636 | Down | -0.61573 | 1.532336972 | 3.24867  | 0.002478 | 0.025475 | u   |
| XLOC_022389 | XLOC_022389 | Down | -0.66257 | 1.582894775 | 1.645031 | 0.002503 | 0.025565 | x   |
| XLOC_021045 | XLOC_021045 | Down | -0.65582 | 1.575511325 | 2.637399 | 0.002522 | 0.025682 | u   |
| XLOC_020951 | XLOC_020951 | Down | -1.1373  | 2.199685185 | 1.564962 | 0.002627 | 0.026326 | u   |
| XLOC_014932 | XLOC_014932 | Down | -0.81177 | 1.75536135  | 0.995172 | 0.002641 | 0.026363 | u   |
| XLOC_032499 | XLOC_032499 | Down | -0.40085 | 1.320287625 | 3.996056 | 0.002669 | 0.026456 | u   |
| XLOC_021046 | XLOC_021046 | Down | -1.17106 | 2.251769726 | -1.42066 | 0.002693 | 0.026546 | u   |
| XLOC_013494 | XLOC_013494 | Down | -0.62544 | 1.542679892 | 2.031394 | 0.002717 | 0.026672 | x   |
| XLOC_005745 | XLOC_005745 | Down | -0.4481  | 1.364243416 | 3.287587 | 0.002765 | 0.026886 | u x |
| XLOC_033811 | XLOC_033811 | Down | -1.64278 | 3.12266761  | -1.3255  | 0.002767 | 0.026886 | u   |
| XLOC_028705 | XLOC_028705 | Down | -2.07598 | 4.216299801 | -2.40299 | 0.002834 | 0.027158 | x   |
| XLOC_017657 | XLOC_017657 | Down | -0.59785 | 1.51345747  | 2.343863 | 0.00289  | 0.027459 | u   |
| XLOC_011766 | XLOC_011766 | Down | -0.72756 | 1.6558398   | 2.46975  | 0.002918 | 0.02764  | x   |
| XLOC_036090 | XLOC_036090 | Down | -0.5185  | 1.43246921  | 3.698305 | 0.003023 | 0.028231 | u   |
| XLOC_005801 | XLOC_005801 | Down | -1.30267 | 2.466847845 | -1.59784 | 0.003034 | 0.028253 | u   |
| XLOC_018649 | XLOC_018649 | Down | -0.80259 | 1.744234862 | 1.478252 | 0.003044 | 0.028294 | u   |
| XLOC_029709 | XLOC_029709 | Down | -0.42432 | 1.341941305 | 3.539424 | 0.003099 | 0.028577 | u x |
| XLOC_025297 | XLOC_025297 | Down | -0.80575 | 1.748058736 | 0.473855 | 0.003113 | 0.028653 | x   |
| XLOC_000539 | XLOC_000539 | Down | -0.87037 | 1.828132219 | 2.068946 | 0.003156 | 0.028869 | x   |
| XLOC_000257 | XLOC_000257 | Down | -0.78197 | 1.71947282  | 0.356125 | 0.003183 | 0.028989 | u   |
| XLOC_000055 | XLOC_000055 | Down | -0.60402 | 1.51994783  | 1.562058 | 0.003235 | 0.02924  | u   |
| XLOC_036596 | XLOC_036596 | Down | -1.23266 | 2.3499984   | -1.56936 | 0.003251 | 0.029326 | u   |
| XLOC_014743 | XLOC_014743 | Down | -1.27527 | 2.420448791 | -1.60412 | 0.003264 | 0.029373 | u   |
| XLOC_025083 | XLOC_025083 | Down | -0.85296 | 1.806199888 | 1.594594 | 0.003309 | 0.029549 | x u |
| XLOC_012449 | XLOC_012449 | Down | -0.87614 | 1.835454476 | 1.231855 | 0.003319 | 0.029579 | x   |
| XLOC_020478 | XLOC_020478 | Down | -0.63157 | 1.549252399 | 2.549914 | 0.003365 | 0.02981  | x   |
| XLOC_024246 | XLOC_024246 | Down | -1.45187 | 2.735628847 | -1.66655 | 0.003374 | 0.029865 | u   |
| XLOC_018560 | XLOC_018560 | Down | -0.73788 | 1.66772834  | 0.339479 | 0.003647 | 0.03127  | u   |
| XLOC_018638 | XLOC_018638 | Down | -0.75524 | 1.687918033 | 1.421152 | 0.003656 | 0.031309 | x   |
| XLOC_002995 | XLOC_002995 | Down | -0.67075 | 1.591901547 | 2.318291 | 0.003713 | 0.031608 | x   |
| XLOC_004718 | XLOC_004718 | Down | -1.07475 | 2.106352729 | -0.46076 | 0.003754 | 0.031769 | x   |
| XLOC_007485 | XLOC_007485 | Down | -1.55338 | 2.935044395 | -1.98859 | 0.003841 | 0.032189 | x   |
| XLOC_000922 | XLOC_000922 | Down | -0.97117 | 1.960434431 | -0.8621  | 0.003883 | 0.032399 | x u |
| XLOC_025268 | XLOC_025268 | Down | -0.52679 | 1.440720956 | 2.306434 | 0.003924 | 0.032624 | u   |
| XLOC_003534 | XLOC_003534 | Down | -0.74118 | 1.671538468 | 0.26075  | 0.003924 | 0.032624 | x   |
| XLOC_028762 | XLOC_028762 | Down | -0.61534 | 1.531914022 | 3.571988 | 0.003928 | 0.032634 | x   |
| XLOC_019722 | XLOC_019722 | Down | -0.86245 | 1.818120975 | -0.25899 | 0.003957 | 0.032755 | u   |
| XLOC_013215 | XLOC_013215 | Down | -0.51327 | 1.427277817 | 3.88973  | 0.004025 | 0.033178 | u x |
| XLOC_007513 | XLOC_007513 | Down | -0.80321 | 1.74497839  | 0.453016 | 0.004056 | 0.033265 | u   |
| XLOC_024385 | XLOC_024385 | Down | -1.23565 | 2.354878824 | -1.36513 | 0.004061 | 0.033284 | u   |
| XLOC_004227 | XLOC_004227 | Down | -2.46629 | 5.526220571 | -3.47387 | 0.004126 | 0.033586 | x   |
| XLOC_015304 | XLOC_015304 | Down | -0.75483 | 1.687430656 | 0.381512 | 0.004209 | 0.033907 | u   |
| XLOC_026354 | XLOC_026354 | Down | -0.61227 | 1.528659982 | 1.171595 | 0.004219 | 0.033961 | u   |
| XLOC_014949 | XLOC_014949 | Down | -1.0106  | 2.014745579 | -0.81253 | 0.004269 | 0.03417  | u   |
| XLOC_003516 | XLOC_003516 | Down | -1.10452 | 2.150279661 | 0.03449  | 0.004286 | 0.034215 | u   |
| XLOC_025413 | XLOC_025413 | Down | -0.50393 | 1.418072501 | 2.936519 | 0.004325 | 0.034407 | u   |

|             |             |      |          |             |          |          |          |     |
|-------------|-------------|------|----------|-------------|----------|----------|----------|-----|
| XLOC_001003 | XLOC_001003 | Down | -3.18746 | 9.110052248 | -5.03155 | 0.004335 | 0.034441 | u   |
| XLOC_000467 | XLOC_000467 | Down | -0.61879 | 1.535586949 | 1.697126 | 0.004346 | 0.03447  | x u |
| XLOC_007273 | XLOC_007273 | Down | -0.89598 | 1.860874639 | 0.001757 | 0.004425 | 0.034827 | u   |
| XLOC_002813 | XLOC_002813 | Down | -1.03696 | 2.05189485  | -0.67238 | 0.004503 | 0.035242 | u   |
| XLOC_002251 | XLOC_002251 | Down | -0.7334  | 1.662547176 | 0.605615 | 0.004517 | 0.0353   | u   |
| XLOC_013077 | XLOC_013077 | Down | -1.4468  | 2.726030381 | -2.17016 | 0.004533 | 0.035336 | u   |
| XLOC_010458 | XLOC_010458 | Down | -2.38197 | 5.212496892 | -2.85275 | 0.004707 | 0.036166 | u   |
| XLOC_012560 | XLOC_012560 | Down | -0.63183 | 1.549533497 | 1.492727 | 0.004797 | 0.03667  | u   |
| XLOC_013452 | XLOC_013452 | Down | -0.55915 | 1.473396456 | 2.452938 | 0.004965 | 0.037392 | u   |
| XLOC_036120 | XLOC_036120 | Down | -2.82214 | 7.072102945 | -3.64501 | 0.005277 | 0.038657 | u   |
| XLOC_013855 | XLOC_013855 | Down | -1.09662 | 2.138530773 | -0.80579 | 0.005287 | 0.038661 | u   |
| XLOC_011987 | XLOC_011987 | Down | -0.5173  | 1.43127492  | 1.81986  | 0.005371 | 0.039085 | x   |
| XLOC_025269 | XLOC_025269 | Down | -0.48242 | 1.397082196 | 4.145549 | 0.005517 | 0.03968  | u   |
| XLOC_005558 | XLOC_005558 | Down | -0.69965 | 1.624107207 | 0.61991  | 0.005552 | 0.03985  | x   |
| XLOC_007280 | XLOC_007280 | Down | -0.62928 | 1.546797693 | 1.389319 | 0.005672 | 0.040369 | u   |
| XLOC_005060 | XLOC_005060 | Down | -0.46927 | 1.384407075 | 2.167461 | 0.005724 | 0.040579 | u   |
| XLOC_003119 | XLOC_003119 | Down | -0.45279 | 1.368681305 | 2.638744 | 0.005753 | 0.040707 | o   |
| XLOC_014601 | XLOC_014601 | Down | -0.77474 | 1.710881593 | 0.088941 | 0.005783 | 0.040856 | u   |
| XLOC_002514 | XLOC_002514 | Down | -1.25666 | 2.389416736 | -1.50304 | 0.005796 | 0.040921 | u   |
| XLOC_026482 | XLOC_026482 | Down | -0.69413 | 1.617911949 | 2.005315 | 0.005809 | 0.040957 | x   |
| XLOC_003160 | XLOC_003160 | Down | -2.08032 | 4.228999408 | -2.67636 | 0.005813 | 0.040961 | u   |
| XLOC_005843 | XLOC_005843 | Down | -1.7368  | 3.332950358 | -3.0165  | 0.005825 | 0.040998 | u   |
| XLOC_032472 | XLOC_032472 | Down | -0.96367 | 1.950262671 | 0.882218 | 0.005838 | 0.041075 | u   |
| XLOC_031252 | XLOC_031252 | Down | -0.85481 | 1.808522174 | 1.170942 | 0.006002 | 0.041891 | u   |
| XLOC_010007 | XLOC_010007 | Down | -0.69368 | 1.617405157 | 1.851312 | 0.006043 | 0.042031 | x   |
| XLOC_024285 | XLOC_024285 | Down | -0.66303 | 1.583403188 | 0.736566 | 0.006188 | 0.042665 | u   |
| XLOC_036637 | XLOC_036637 | Down | -0.90455 | 1.871955201 | 0.34771  | 0.006215 | 0.042765 | u   |
| XLOC_011941 | XLOC_011941 | Down | -0.68705 | 1.60999233  | 0.469164 | 0.006287 | 0.043112 | u   |
| XLOC_000699 | XLOC_000699 | Down | -0.46766 | 1.382869048 | 2.473823 | 0.006303 | 0.043167 | u   |
| XLOC_012115 | XLOC_012115 | Down | -0.40911 | 1.327870455 | 3.359017 | 0.006347 | 0.043376 | x   |
| XLOC_024203 | XLOC_024203 | Down | -0.69271 | 1.61632213  | 1.492118 | 0.006355 | 0.043389 | u   |
| XLOC_010462 | XLOC_010462 | Down | -0.90506 | 1.872616075 | -0.41272 | 0.006491 | 0.043879 | u   |
| XLOC_017821 | XLOC_017821 | Down | -0.93016 | 1.905484434 | -0.05328 | 0.006536 | 0.044083 | u   |
| XLOC_019773 | XLOC_019773 | Down | -0.44955 | 1.365618322 | 2.672978 | 0.006755 | 0.044849 | x   |
| XLOC_009292 | XLOC_009292 | Down | -0.59719 | 1.51276996  | 0.772121 | 0.006826 | 0.045184 | u   |
| XLOC_032225 | XLOC_032225 | Down | -0.65574 | 1.57542691  | 0.96039  | 0.006901 | 0.045464 | u   |
| XLOC_028346 | XLOC_028346 | Down | -0.77374 | 1.709701855 | 0.677482 | 0.006953 | 0.045661 | u   |
| XLOC_013087 | XLOC_013087 | Down | -0.81977 | 1.765129898 | 0.249062 | 0.007202 | 0.046729 | u   |
| XLOC_026607 | XLOC_026607 | Down | -1.32973 | 2.513547927 | -1.97663 | 0.00722  | 0.046807 | u   |
| XLOC_037073 | XLOC_037073 | Down | -0.88793 | 1.850525259 | -0.91005 | 0.007303 | 0.047042 | u   |
| XLOC_005454 | XLOC_005454 | Down | -0.69703 | 1.621163032 | 2.722133 | 0.007327 | 0.047044 | x   |
| XLOC_003585 | XLOC_003585 | Down | -0.61981 | 1.536670924 | 0.641272 | 0.007644 | 0.048222 | u   |
| XLOC_010545 | XLOC_010545 | Down | -0.75119 | 1.683181028 | 0.784994 | 0.007802 | 0.04882  | x   |
| XLOC_019208 | XLOC_019208 | Down | -0.64081 | 1.559205625 | 4.09699  | 0.007824 | 0.048878 | x   |
| XLOC_030509 | XLOC_030509 | Down | -0.73929 | 1.669355031 | 2.339516 | 0.007868 | 0.048996 | u   |
| XLOC_015278 | XLOC_015278 | Down | -1.08989 | 2.128574754 | -0.62658 | 0.007995 | 0.049423 | x   |
| XLOC_000706 | XLOC_000706 | Down | -0.69991 | 1.624401248 | 0.470992 | 0.007998 | 0.049433 | u   |



**Supplemental table 8**

**Chromosomal description of the two novel lncRNAs *βlinc2* and *βlinc3***

| Transcript n°                    | transcripts <i>βlinc2</i>                                                                                                                               | n° exons | coding_pote locus             | chr.  | strand | Average FPKM | Distance from closest prot cod gene |
|----------------------------------|---------------------------------------------------------------------------------------------------------------------------------------------------------|----------|-------------------------------|-------|--------|--------------|-------------------------------------|
| 1                                | TCONS_00028200                                                                                                                                          | 7        | 3.04 chr14:72825060-72839586  | chr14 | -      | 0.0484       | About 98.174 (Fndc3a)               |
| 2                                | TCONS_00028201                                                                                                                                          | 8        | 3.03 chr14:72825060-72839586  | chr14 | -      | 0.0004       |                                     |
| 3                                | TCONS_00028202                                                                                                                                          | 7        | 2.37 chr14:72825060-72839586  | chr14 | -      | 0.0550       |                                     |
| <b>transcripts <i>βlinc3</i></b> |                                                                                                                                                         |          |                               |       |        |              |                                     |
| 4                                | TCONS_00033681                                                                                                                                          | 1        | -2.17 chr16:46348870-46372854 | chr16 | +      | 0.0740       | About 20.000bp (Pvrl3)              |
| 5                                | TCONS_00033682                                                                                                                                          | 2        | -1.37 chr16:46348870-46372854 | chr16 | +      | 0.0493       |                                     |
| 6                                | TCONS_00033683                                                                                                                                          | 2        | -1.58 chr16:46348870-46372854 | chr16 | +      | 0.0482       |                                     |
| 7                                | TCONS_00033684                                                                                                                                          | 2        | -1.09 chr16:46348870-46372854 | chr16 | +      | 0.0319       |                                     |
| <b>exon_coordinates</b>          |                                                                                                                                                         |          |                               |       |        |              |                                     |
| 1                                | 72825061..72826240,72827676..72827813,72831482..72831611,72833735..72833835,72834164..72834279,72835436..72835601,72835723..72835749                    |          |                               |       |        |              |                                     |
| 2                                | 72825061..72826240,72827676..72827813,72831482..72831611,72833735..72833835,72834164..72834279,72835436..72835613,72835723..72835883,72839522..72839586 |          |                               |       |        |              |                                     |
| 3                                | 72828241..72828269,72831482..72831611,72833735..72833835,72834164..72834279,72835436..72835613,72835723..72835883,72839522..72839586                    |          |                               |       |        |              |                                     |
| 4                                | 46348871..46350916                                                                                                                                      |          |                               |       |        |              |                                     |
| 5                                | 46348871..46349059,46359752..46360444                                                                                                                   |          |                               |       |        |              |                                     |
| 6                                | 46348883..46349059,46370862..46372854                                                                                                                   |          |                               |       |        |              |                                     |
| 7                                | 46359052..46360039,46370862..46372854                                                                                                                   |          |                               |       |        |              |                                     |

**Supplemental table 9**

Characteristics of mice utilised for validating experiments and correlations.

| mouse ID       | weight before diet | weight at sacrifice (g) | glycemia at sacrifice (mg/dl) | Insulinemia at sacrifice (ng/ml) |
|----------------|--------------------|-------------------------|-------------------------------|----------------------------------|
| ND 1.2         | 18.7               | 26.7                    | 138.6                         | 0.60                             |
| ND 3.1         | 20.2               | 24.9                    | 131.4                         | 0.52                             |
| ND 4.1         | 21.7               | 30.0                    | 129.6                         | 0.69                             |
| ND 4.2         | 21.2               | 29.2                    | 142.2                         | 0.60                             |
| ND 7.1         | 20.5               | 27.8                    | 133.2                         | 0.61                             |
| ND 9.1         | 21.4               | 30.6                    | 156.6                         | 0.69                             |
| ND 10.1        | 20.1               | 27.1                    | 138.6                         | 1.21                             |
| ND 11.1        | 19.5               | 26.0                    | 126.0                         | 0.87                             |
| <b>Average</b> | <b>20.4</b>        | <b>27.8</b>             | <b>137.0</b>                  | <b>0.7</b>                       |
| <b>SEM</b>     | <b>0.4</b>         | <b>0.7</b>              | <b>3.4</b>                    | <b>0.1</b>                       |
| LDR 13.1       | 21.2               | 38.1                    | 185.4                         | 3.46                             |
| LDR 16.1       | 19.0               | 33.6                    | 153.0                         | 0.71                             |
| LDR 17.2       | 20.5               | 39.0                    | 138.6                         | 1.40                             |
| LDR 18.1       | 21.9               | 37.5                    | 135.0                         | 1.19                             |
| LDR 22.1       | 20.4               | 36.7                    | 147.6                         | 0.80                             |
| LDR 25.1       | 22.0               | 33.2                    | 158.4                         | 0.71                             |
| LDR 26.1       | 20.4               | 37.6                    | 172.8                         | 1.13                             |
| LDR 29.1       | 21.2               | 34.9                    | 147.6                         | 0.82                             |
| LDR 31.1       | 21.1               | 38.6                    | 147.6                         | 0.95                             |
| LDR 38.1       | 20.6               | 33.4                    | 163.8                         | 0.81                             |
| <b>Average</b> | <b>20.8</b>        | <b>36.3</b>             | <b>155.0</b>                  | <b>1.20</b>                      |
| <b>SEM</b>     | <b>0.3</b>         | <b>0.7</b>              | <b>4.9</b>                    | <b>0.26</b>                      |
| 20.1           | 21.0               | 41.1                    | 176.4                         | 0.74                             |
| 20.2           | 20.6               | 42.8                    | 228.6                         | 3.63                             |
| 27.2           | 21.8               | 46.4                    | 268.2                         | 10.73                            |
| 28.1           | 24.1               | 45.6                    | 219.6                         | 2.78                             |
| 28.2           | 19.6               | 42.1                    | 151.2                         | 1.56                             |
| 30.1           | 24.7               | 43.1                    | 178.2                         | 0.84                             |
| 33.1           | 20.6               | 42.6                    | 154.8                         | 1.67                             |
| 39.1           | 22.4               | 43.7                    | 165.6                         | 1.07                             |
| <b>Average</b> | <b>21.9</b>        | <b>43.4</b>             | <b>192.8</b>                  | <b>2.9</b>                       |
| <b>SEM</b>     | <b>0.6</b>         | <b>0.6</b>              | <b>14.7</b>                   | <b>1.2</b>                       |

## Supplemental table 10

### Chromosomal location of transmapped region in human for *$\beta$ linc3*.

| XLOC ID     | lncRNA name                    | Chromosomal location in mouse (mm9) | Transmapped region in Human (h18) |
|-------------|--------------------------------|-------------------------------------|-----------------------------------|
| XLOC_013310 | <i><math>\beta</math>linc3</i> | Chr16:46348870-46372854             | Chr3:112413340-112434554          |
|             |                                |                                     | Transmapped region in Human (h19) |
|             |                                |                                     | Chr3:112694493-112715707          |
